# Supplementary material for: Aviation contrail climate effects in the North Atlantic from 2016 to 2021
Source: Copernicus journal article supplement (doi:10.5194/acp-22-10919-2022), 2022-08-29
Supplement: Supplementary file 1 [file acp-22-10919-2022-supplement.pdf]

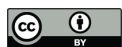

*Supplement of*

## **Aviation contrail climate effects in the North Atlantic from 2016 to 2021**

**Roger Teoh et al.**

*Correspondence to:* Marc E. J. Stettler ([m.stettler@imperial.ac.uk](mailto:m.stettler@imperial.ac.uk))

The copyright of individual parts of the supplement might differ from the article licence.

|    |                                                                   |    |
|----|-------------------------------------------------------------------|----|
| 24 | <b>Contents</b>                                                   |    |
| 25 | S1 Air Traffic Dataset.....                                       | 3  |
| 26 | S2 nvPM Number Emissions Index.....                               | 7  |
| 27 | S2.1 Background Information.....                                  | 7  |
| 28 | S2.2 Methodology.....                                             | 10 |
| 29 | S2.3 Example & Comparison .....                                   | 14 |
| 30 | S3 Correction to ERA5 humidity fields.....                        | 16 |
| 31 | S4 Conditions for forming strongly warming/cooling contrails..... | 25 |
| 32 | S5 Uncertainty analysis .....                                     | 29 |
| 33 | S6 Sensitivity analysis .....                                     | 34 |
| 34 | References.....                                                   | 38 |
| 35 |                                                                   |    |
| 36 |                                                                   |    |
| 37 |                                                                   |    |

## S1 Air Traffic Dataset

The air traffic dataset used in this study is provided by the UK air navigation service provider (NATS) for the period between 1-January-2016 and 31-March-2021. There are 2,106,317 recorded civil flights in the dataset and the following information is provided for each flight:

- call sign,
- operator,
- ICAO airport code for the origin and destination airports,
- ICAO aircraft type designator,
- up to 10 waypoints containing the 4D positional data (longitude, latitude, altitude, and time) are recorded when the flight passes through a series of fixed waypoints along the route, and
- any air traffic commands when the flight executes a step climb/descent in between the recorded waypoints.

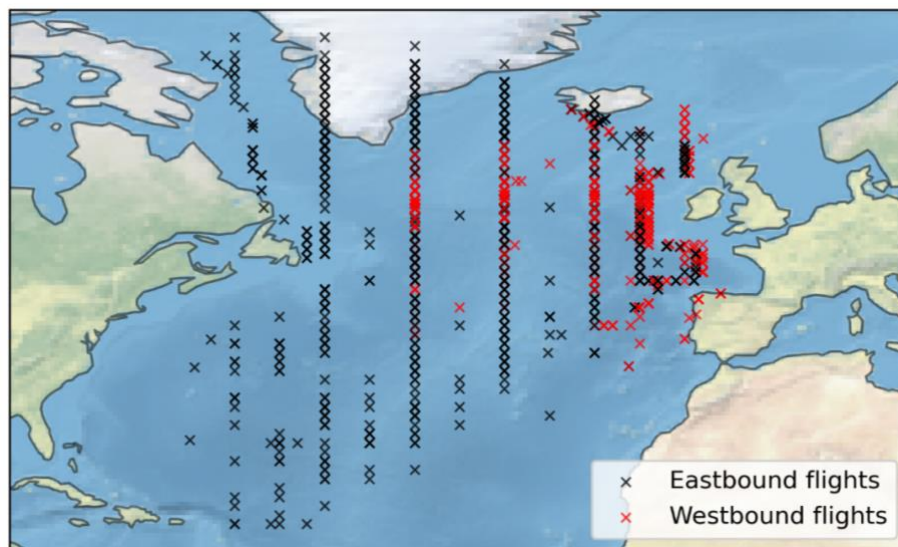

Figure S1: Waypoints that are provided by the NATS air traffic dataset for 1-January-2019. Basemap plotted using Cartopy 0.20.2 (C) Natural Earth; license: public domain.

Figure S1 shows an example of the waypoints that are provided by the NATS dataset for 1-January-2019. As noted in the main text (Section 2.1) and demonstrated in Fig. S1, waypoints for eastbound flights are available before the flights enters the Shanwick OACC (between  $10^{\circ}\text{W}$  to  $70^{\circ}\text{W}$ ); while waypoints for westbound flights are not available outside Shanwick ( $10^{\circ}\text{W}$  to  $40^{\circ}\text{W}$ ). We perform a great circle interpolation at a constant flight level between: (i) the recorded waypoints; (ii) the origin airport and first recorded waypoint; and (iii) the final recorded waypoint and the destination airport to obtain a full trajectory coverage in the Shanwick and Gander OACC (Fig. S2 and S3) with a uniform temporal resolution of 60 s (average segment length of 15 km). Any waypoints outside Shanwick and Gander are then removed, and the processed dataset, therefore, approximates the air traffic activity in the North Atlantic flight corridor (Fig. S4). We assume the spatial bounding box of the Shanwick and Gander OACC to be  $(-50^{\circ}\text{W}, 40^{\circ}\text{N}, -10^{\circ}\text{W}, 75^{\circ}\text{N})$  minus the air traffic activity in the Shannon OACC  $(-15^{\circ}\text{W}, 51^{\circ}\text{N}, -10^{\circ}\text{W}, 54.5^{\circ}\text{N})$ , and the total surface area in this region is equal to  $9.026 \times 10^{12} \text{ m}^2$ .

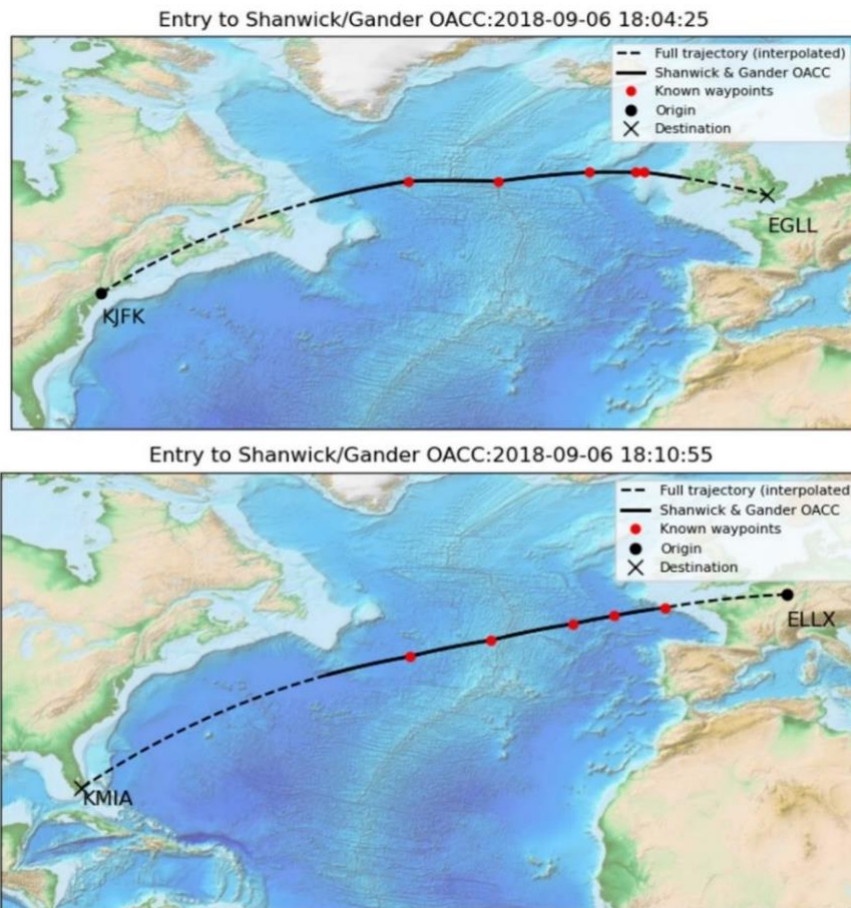

Figure S2: Examples of the flight trajectories in the processed NATS dataset. The data points in red are waypoints that are provided by the original NATS dataset, the solid black lines connecting the recorded waypoints are interpolated by assuming a great circle distance. Basemap plotted using Cartopy 0.20.2 (C) Natural Earth; license: public domain.

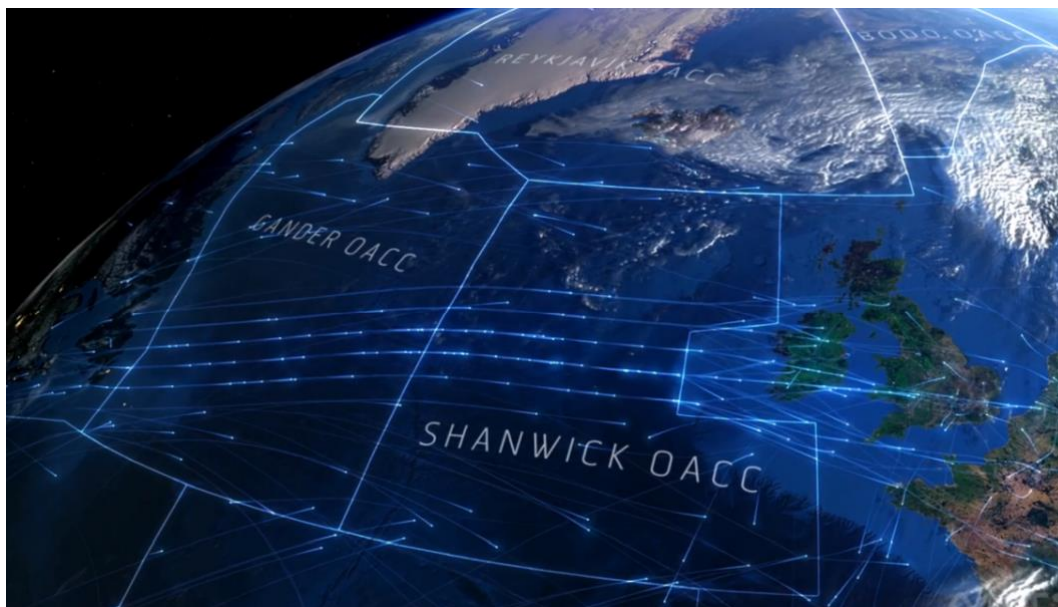

Figure S3: Boundaries of the Shanwick and Gander OACC, which covers the air traffic activity in the North Atlantic flight corridor. (Source: NATS (2014))

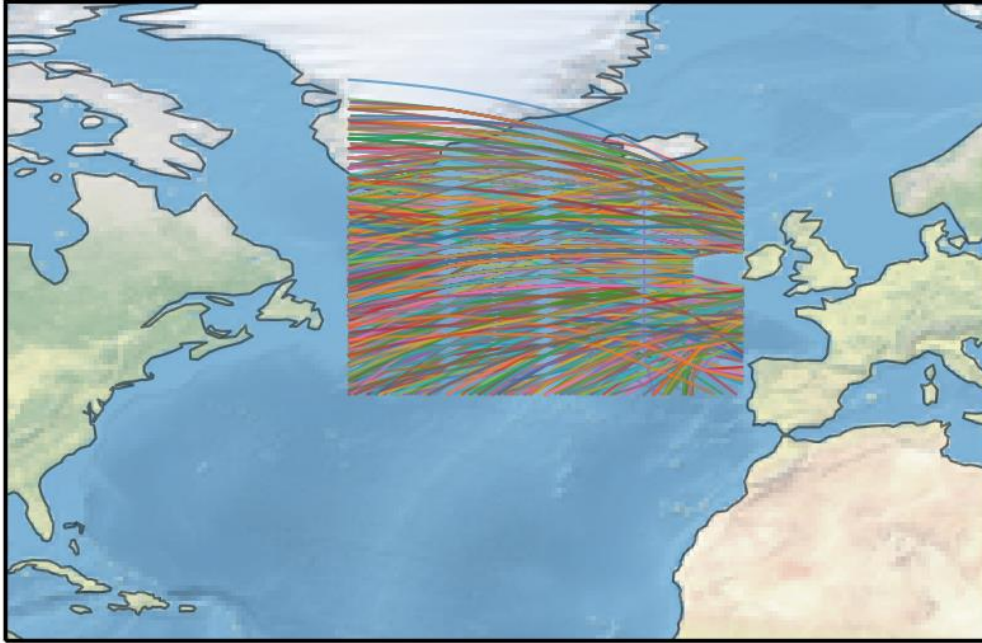

**Figure S4: Example of the flight trajectories from the processed NATS dataset for 1-January-2019. Each line represents the trajectory of a single flight. Basemap plotted using Cartopy 0.20.2 (C) Natural Earth; license: public domain.**

The air traffic density in this region is calculated by dividing the total flight distance per hour with the airspace area ( $9.026 \times 10^{12} \text{ m}^2$ ). Figure S5a shows that the air traffic density in the North Atlantic region for 2019 ranges from 0.002 to 0.034  $\text{km}^{-1} \text{ h}^{-1}$ . This range is smaller than the values reported by Schumann & Graf (2013), between 0.01 and 0.05  $\text{km}^{-1} \text{ h}^{-1}$ , because we considered a larger spatial domain (refer to the spatial bounding boxes in Fig. S5b). For comparison, the air traffic density in Europe and North America are estimated to be above 0.06  $\text{km}^{-1} \text{ h}^{-1}$  (Schumann and Graf, 2013). Figure S6 provides a breakdown of the fleet composition by aircraft type and its evolution over time.



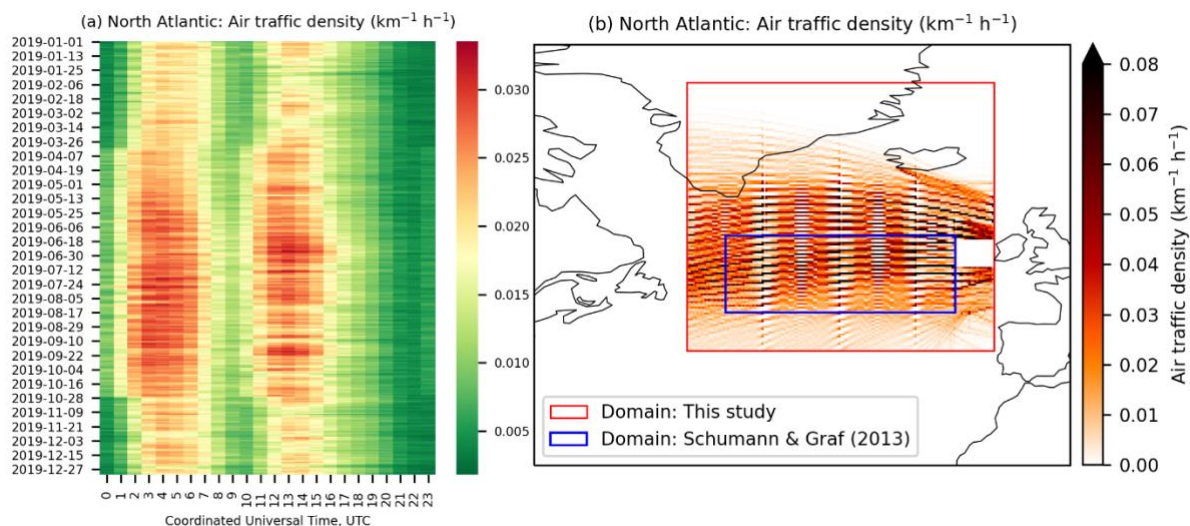

**Figure S5: The air traffic density in the North Atlantic region by distance travelled that is averaged (a) for each hour; and (b) across the spatial domain for 2019. Basemap plotted using Cartopy 0.20.2 (C) Natural Earth; license: public domain.**

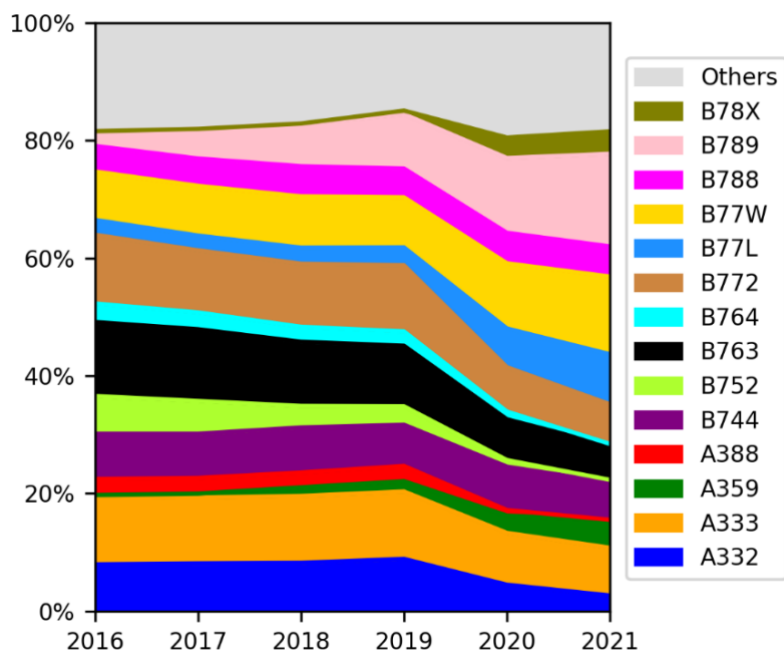

**Figure S6: Fleet composition by aircraft type for all flights that traversed the Shanwick and Gander OACC between January-2016 to March-2021**

## **S2 nvPM Number Emissions Index**

### **S2.1 Background Information**

A new dataset containing measurements of non-volatile particulate matter (nvPM) emissions from turbofan engines has been added to the International Civil Aviation Organization (ICAO)

Aircraft Emissions Databank (EDB) in December 2020 (ICAO, 2021). This dataset is publicly available and contains 194 distinct turbofan engines, including those that are currently in production and new aircraft engine types with a rated thrust above 26.7 kN. For each engine, the measured nvPM number ( $EI_n$  in  $kg^{-1}$ ) and mass emissions index ( $EI_m$  in  $g\ kg^{-1}$ ) is reported at the four ICAO certification test points (7%, 30%, 85% and 100% of the maximum rated engine thrust) that represent the engine power settings typically used in a landing and take-off (LTO) cycle. These nvPM measurements have been corrected for dilution, thermophoretic and particle line losses (EASA, 2020).

We used the Base of Aircraft Data (BADA) Family 3 and 4 databases to match a given aircraft type to an engine (Eurocontrol, 2016, 2014). Table S1 compiles the 47 aircraft-engine pairs that have been successfully identified. An exploratory data analysis of the dataset showed that the combustor type of different turbofan engines can lead to large differences in the emissions profile for the nvPM  $EI_n$  and  $EI_m$  (Fig. S7): the nvPM  $EI_n$  from twin annular premixing swirler (TAPS) engines that power the Boeing 737 MAX, Boeing 747-800 and Boeing 787-10 Dreamliner decreases from  $10^{14}\ kg^{-1}$  to  $10^{11}\ kg^{-1}$  with increasing engine power (Fig. S7i and S7j), while the  $EI_n$  for Floatwall combustors that are equipped by the Airbus A320ceo has a smaller range but stays high at around  $3\ to\ 7 \times 10^{15}\ kg^{-1}$  (Fig. S7b). These results highlight the need to develop a new approach to estimate the nvPM emissions that can capture the distinct emissions profile for different combustor types.



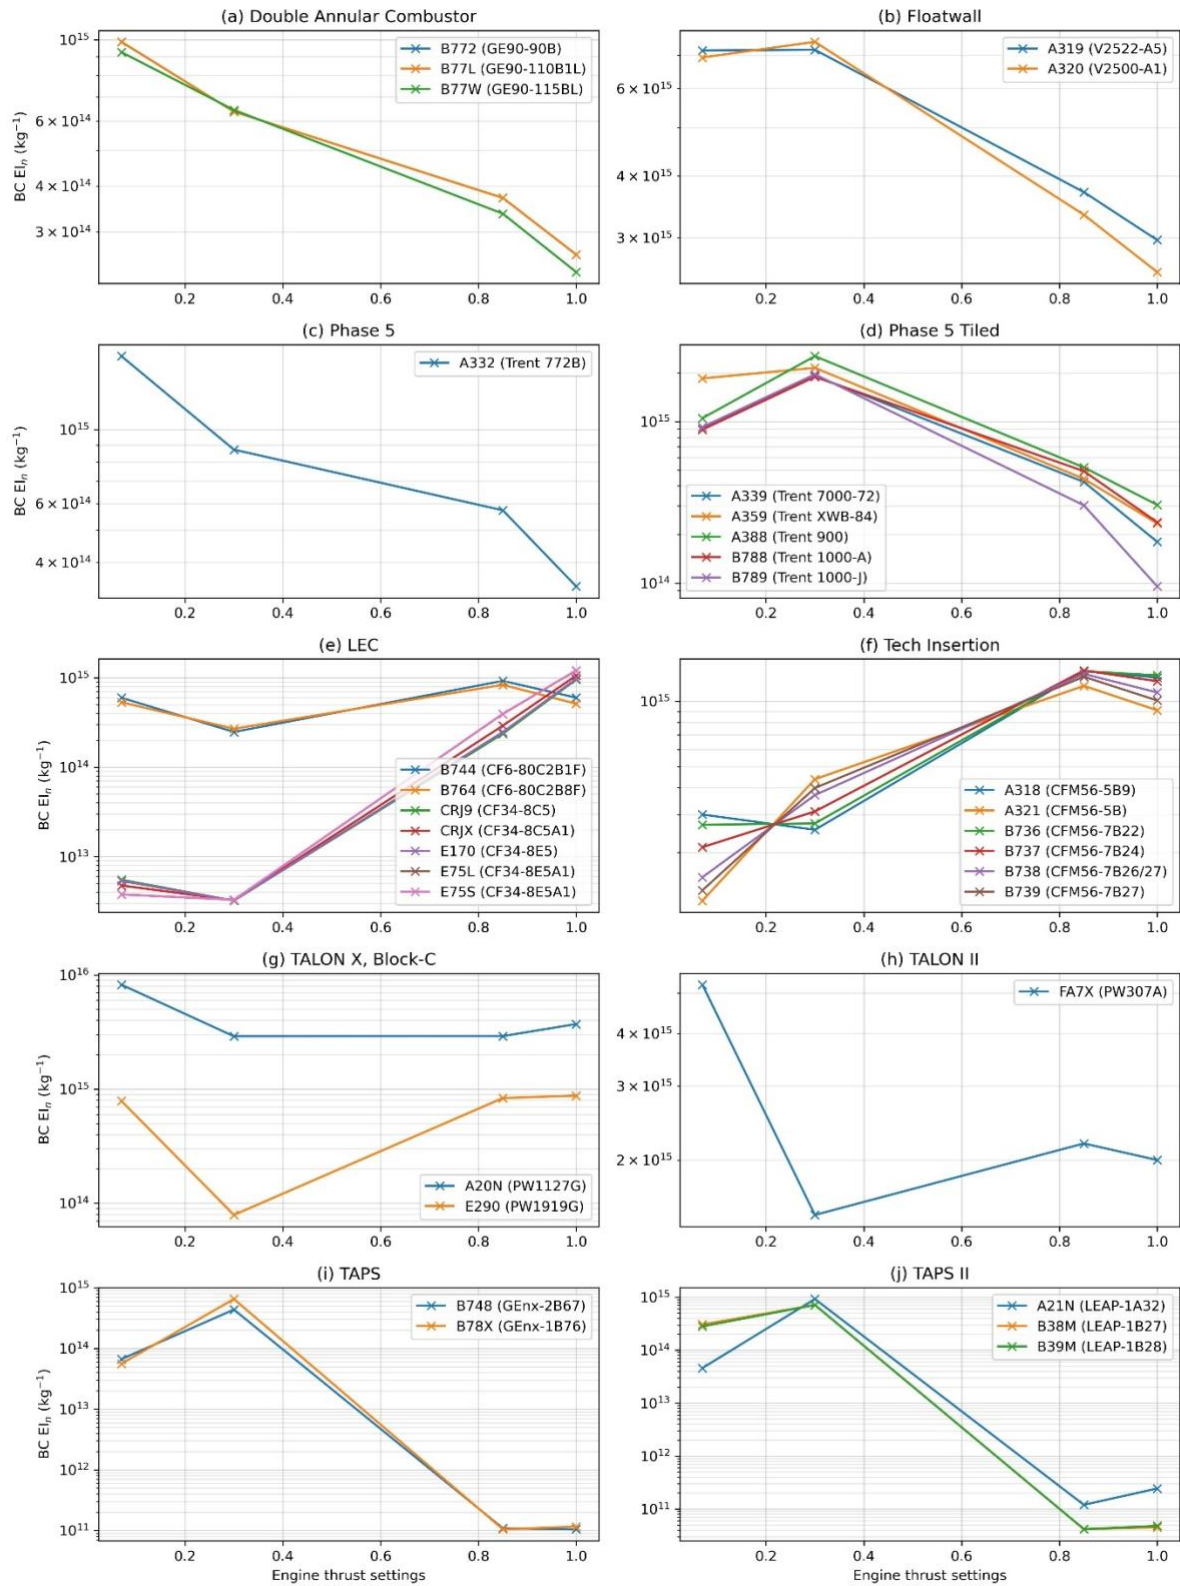

**Figure S7: ICAO EDB measurements of the nvPM  $EI_n$  (corrected for system loss) at the four ICAO certification test points (7%, 30%, 85% and 100% of the maximum rated engine thrust) by combustor type and aircraft-engine pairs.**

## S2.2 Methodology

In this study, we used measurements from the ICAO EDB to develop an approach to estimate the nvPM  $EI_n$  at cruise conditions (ICAO, 2021). This approach is based on linear interpolation of the nvPM measurements relative to the engine power, which is comparable to the Fuel Flow Method 2 (FFM2) methodology that was developed to estimate the nitrogen oxide emission indices ( $EI_{NO_x}$ ) at cruise conditions (DuBois and Paynter, 2006).

**Table S1: Compilation of the aircraft-engine assignment list that is used to obtain the engine-specific  $NO_x$  emissions and nvPM  $EI_n$  from the ICAO EDB.**

| Aircraft Type            | ICAO Code | Engine Identification | Manufacturer               | Combustor Description   |
|--------------------------|-----------|-----------------------|----------------------------|-------------------------|
| Airbus A320neo           | A20N      | PW1127G               | Pratt & Whitney            | TALON X, Block-C        |
| Airbus A321neo           | A21N      | LEAP-1A32             | CFM International          | TAPS II                 |
| Airbus A318              | A318      | CFM56-5B9             | CFM International          | Tech Insertion          |
| Airbus A319              | A319      | V2522-A5              | International Aero Engines | Floatwall               |
| Airbus A320              | A320      | V2527-A5              | International Aero Engines | Floatwall               |
| Airbus A321              | A321      | CFM56-5B              | CFM International          | Tech Insertion          |
| Airbus A330-200          | A332      | Trent 772B            | Rolls-Royce plc            | Phase5                  |
| Airbus A330-900          | A339      | Trent 7000-72         | Rolls-Royce plc            | Phase5 Tiled            |
| Airbus A350-900          | A359      | Trent XWB-84          | Rolls-Royce plc            | Phase5 Tiled            |
| Airbus A350-1000         | A35K      | Trent XWB-97          | Rolls-Royce plc            | Phase5 Tiled (Improved) |
| Airbus A380-800          | A388      | Trent 900             | Rolls-Royce plc            | Phase5 Tiled            |
| Boeing 737 MAX 8         | B38M      | LEAP-1B27             | CFM International          | TAPS II                 |
| Boeing 737 MAX 9         | B39M      | LEAP-1B28             | CFM International          | TAPS II                 |
| Boeing 737-600           | B736      | CFM56-7B22            | CFM International          | Tech Insertion          |
| Boeing 737-700           | B737      | CFM56-7B24            | CFM International          | Tech Insertion          |
| Boeing 737-800           | B738      | CFM56-7B26/27         | CFM International          | Tech Insertion          |
| Boeing 737-900           | B739      | CFM56-7B27            | CFM International          | Tech Insertion          |
| Boeing 747-400           | B744      | CF6-80C2B1F           | General Electric Company   | LEC                     |
| Boeing 747-8F            | B748      | GENx-2B67             | General Electric Company   | TAPS                    |
| Boeing 767-400ER         | B764      | CF6-80C2B8F           | General Electric Company   | LEC                     |
| Boeing 777-200           | B772      | GE90-90B              | General Electric Company   | DAC                     |
| Boeing 777-200 Freighter | B77L      | GE90-110B1L           | General Electric Company   | DAC                     |
| Boeing 777-300ER         | B77W      | GE90-115BL            | General Electric Company   | DAC                     |
| Boeing 787-8             | B788      | Trent 1000-A          | Rolls-Royce plc            | Phase5 Tiled            |
| Boeing 787-9             | B789      | Trent 1000-J          | Rolls-Royce plc            | Phase5 Tiled            |
| Boeing 787-10            | B78X      | GENx-1B76             | General Electric Company   | TAPS                    |

|                            |      |                |                          |                            |
|----------------------------|------|----------------|--------------------------|----------------------------|
| Bombardier Challenger 300  | CL30 | AS907-1-1A     | Honeywell                | SABER-1                    |
| Canadair Challenger        | CL60 | CF34-3B        | General Electric Company | SAC                        |
| Canadair Regional Jet 200  | CRJ2 | CF34-3B1       | General Electric Company | SAC                        |
| Canadair Regional Jet 900  | CRJ9 | CF34-8C5       | General Electric Company | LEC                        |
| Canadair Regional Jet 1000 | CRJX | CF34-8C5A1     | General Electric Company | LEC                        |
| Embraer RJ135              | E135 | AE 3007A1/3    | Rolls-Royce Corporation  | Type 3 (reduced emissions) |
| Embraer RJ145              | E145 | AE 3007A1      | Rolls-Royce Corporation  | Type 3 (reduced emissions) |
| Embraer 170                | E170 | CF34-8E5       | General Electric Company | LEC                        |
| Embraer E190-E2            | E290 | PW1919G        | Pratt & Whitney          | TALON X, Block-C           |
| Embraer Legacy 600         | E35L | AE 3007A1E     | Rolls-Royce Corporation  | Type 3 (reduced emissions) |
| Embraer ERJ-145XR          | E45X | AE 3007A1E     | Rolls-Royce Corporation  | Type 3 (reduced emissions) |
| Embraer Legacy 450         | E545 | AS907-3-1E     | Honeywell                | SABER-1                    |
| Embraer Legacy 500         | E550 | AS907-3-1E     | Honeywell                | SABER-1                    |
| Embraer 175 (long wing)    | E75L | CF34-8E5A1     | General Electric Company | LEC                        |
| Embraer 175 (short wing)   | E75S | CF34-8E5A1     | General Electric Company | LEC                        |
| Dassault Falcon 7X         | FA7X | PW307A         | Pratt & Whitney Canada   | TALON II                   |
| Bombardier Global 5000     | GL5T | BR700-710A2-20 | Rolls-Royce Deutschland  |                            |
| Bombardier Global Express  | GLEX | BR700-710A2-20 | Rolls-Royce Deutschland  |                            |
| Gulfstream V               | GLF5 | BR700-710C4-11 | Rolls-Royce Deutschland  | Annular                    |
| Hawker 4000                | HA4T | PW308A         | Pratt & Whitney Canada   | Annular                    |
| Sukhoi Superjet 100-95     | SU95 | SaM146-1S17    | PowerJet S.A.            |                            |

132 For each engine, the engine thrust settings ( $\frac{F}{F_{00,\max}}$ ) at the four ICAO certification test points  
133 are first estimated by dividing the fuel mass flow rate ( $\dot{m}_f$  in  $\text{kg s}^{-1}$ ) by the maximum fuel mass  
134 flow rate ( $\dot{m}_{f,\max}$ ), both of which are provided in the ICAO EDB,

$$\frac{F}{F_{00,\max}} = \frac{\dot{m}_f}{\dot{m}_{f,\max}}, \quad (\text{S1})$$

135 where  $\dot{m}_{f,\max}$  is assumed to be the fuel mass flow rate at take-off conditions. Once  $\frac{F}{F_{00,\max}}$  is  
136 available, we calculate the thermodynamic quantities at different sections of the turbofan  
137 engine to estimate the ratio of turbine inlet to compressor inlet temperatures ( $T_4/T_2$ ), a non-  
138 dimensional measure of engine power that account for differences in operating conditions at  
139 ground and cruise conditions (Cumpsty and Heyes, 2015). The use of  $T_4/T_2$  circumvents the

140 need for a cruise scaling equation such as the Döpelheuer & Lecht method (1998), as will be  
 141 shown in §S2.3.

142 First, the compressor inlet pressure ( $P_2$ ) and temperature ( $T_2$ ) are calculated,

$$P_2[\text{Pa}] = P_{\text{amb}} \left(1 + \frac{\gamma-1}{2} M_a^2\right)^{\frac{\gamma}{\gamma-1}}, \quad (\text{S2})$$

$$T_2[\text{K}] = T_{\text{amb}} \left(1 + \frac{\gamma-1}{2} M_a^2\right), \quad (\text{S3})$$

143 where  $\gamma = 1.4$  is the ratio of specific heats,  $P_{\text{amb}}$  is the ambient pressure,  $T_{\text{amb}}$  is the ambient  
 144 temperature and  $Ma$  is the aircraft Mach number. For conditions on the ground, we assume that  
 145  $P_{\text{amb}} = 101325 \text{ Pa}$ ,  $Ma = 0$ , and  $T_{\text{amb}}$  values are provided in the ICAO EDB.

146 Next, we estimate the combustor inlet pressure ( $P_3$ ) and temperature ( $T_3$ ),

$$P_3[\text{Pa}] = P_2(\pi_{00} - 1) \left(\frac{F}{F_{00,\text{max}}}\right) + P_2, \quad (\text{S4})$$

$$T_3[\text{K}] = T_2 \left(\frac{P_3}{P_2}\right)^{\frac{\gamma-1}{\gamma n_p}}, \quad (\text{S5})$$

147 where  $\pi_{00}$  is the engine pressure ratio provided in the ICAO EDB and  $n_p = 0.9$  is the  
 148 compressor efficiency. Finally, the turbine inlet temperature ( $T_4$ ) is calculated,

$$T_4[\text{K}] = \frac{\text{AFR } c_{p,a} T_3 + \text{LCV}}{c_{p,e} (1 + \text{AFR})}, \quad (\text{S6})$$

$$\text{where } \text{AFR}_{\text{ground}} = \left(0.0121 \left(\frac{F}{F_{00,\text{max}}}\right) + 0.008\right)^{-1}, \quad \text{and} \quad (\text{S7})$$

$$\text{AFR}_{\text{cruise}} = \text{AFR}_{\text{ground}} \left(\frac{T_2}{T_{\text{msl}}}\right). \quad (\text{S8})$$

149 AFR is the air-to-fuel ratio,  $c_{p,a} = 1005 \text{ J kg}^{-1} \text{ K}^{-1}$  and  $c_{p,e} = 1250 \text{ J kg}^{-1} \text{ K}^{-1}$  are the heat capacity  
 150 at a constant pressure of air and for combustion products,  $\text{LCV} = 43.2 \text{ MJ kg}^{-1}$  is the lower

calorific value of kerosene, and  $T_{msl} = 288.15$  K is the temperature at mean sea level. We note that these thermodynamic equations ( $P_2$ ,  $T_2$ ,  $P_3$ ,  $T_3$  and  $T_4$ ) are widely used in the literature to model the thermodynamic performance of jet engines (Cumpsty and Heyes, 2015; Agarwal et al., 2019; Stettler et al., 2013), and have also been validated with data provided by flight data recorders (Stettler et al., 2013; Stettler, 2013). Eq. (S7) that is used to estimate the  $AFR_{ground}$  was formulated using data from five different engine types (Stettler et al., 2013), while the AFR scaling from ground to cruise, Eq. (S8), is based on a standard non-dimensional analysis from DuBois & Paynter (2006).

Once the  $T_4/T_2$  is calculated at the four ICAO certification test points, we formulated a relationship between the nvPM  $EI_n$  and  $T_4/T_2$  by assuming a linear fit between each pair of points. The estimated  $T_4/T_2$  at cruise conditions are then used to interpolate the nvPM  $EI_n$ . While more detailed measurements have shown that the nvPM emissions profile of certain engines can be discontinuous or non-linear (Durdina et al., 2017; Boies et al., 2015), the four data points that are provided by the ICAO EDB are not sufficient to construct custom fits for each engine and account for these effects. Despite that, the EDB-interpolation approach is an improvement relative to existing methodologies that are currently used to estimate the nvPM  $EI_n$  and  $EI_m$ , such as the Smoke Correlation for Particle Emissions CAEP11 (SCOPE11) (Agarwal et al., 2019), Formation and Oxidation (FOX) (Stettler et al., 2013) and Improved FOX (Abrahamson et al., 2016) methods, because it captures differences in the distinct emissions profile for different engine/combustor types. The Fractal Aggregates (FA) model, on the other hand, estimates the nvPM  $EI_n$  from the  $EI_m$  (using FOX and ImFOX), particle size distribution and morphology; and  $EI_m$  estimates from the FOX and ImFOX methods were formulated based on the emissions profile of singular annular combustors (Teoh et al., 2020b, a, 2019).

### S2.3 Example & Comparison

Several studies have measured the aircraft nvPM EI<sub>n</sub> at cruise conditions (Voigt et al., 2021; Moore et al., 2017). Here, we use published data from Voigt et al. (2021) (Airbus A320, IAE-V2527-A5 engines) as a worked example to estimate the nvPM EI<sub>n</sub>, and then compare it with the measured EI<sub>n</sub> for conventional fuels. The operating condition and measured nvPM for the standard Jet A1 fuel scenario (Ref2) are provided below:

- Altitude = 10670 m; Pressure altitude,  $P_{\text{amb}} \approx 23850$  Pa
- Ambient temperature,  $T_{\text{amb}} = 215$  K
- Mach number = 0.65
- Fuel mass flow rate per engine =  $1180 \text{ kg h}^{-1}$  ( $0.328 \text{ kg s}^{-1}$ )
- Measured nvPM EI<sub>n</sub> =  $4.9 \pm 0.6 \times 10^{15} \text{ kg}^{-1}$  (1 S.D.)

The engine properties, fuel mass flow rate and emissions profile for an Airbus A320 (IAE V2527-A5) are extracted from the ICAO EDB:

- Engine pressure ratio,  $\pi_{00} = 27.1$
- Fuel flow ( $\dot{m}_f$ ) and nvPM EI<sub>n</sub> (system loss corrected):

| LTO Cycle                                                 | Idle   | Approach | Climb out | Take-off |
|-----------------------------------------------------------|--------|----------|-----------|----------|
| $\dot{m}_f$ (kg s <sup>-1</sup> )                         | 0.134  | 0.328    | 0.873     | 1.049    |
| $\left(\frac{T_4}{T_2}\right)_{\text{Calculated}}$        | 2.1997 | 3.0173   | 4.37644   | 4.6987   |
| nvPM EI <sub>n</sub> ( $\times 10^{15} \text{ kg}^{-1}$ ) | 6.93   | 7.45     | 3.34      | 2.56     |

The thermodynamic quantities that are required to estimate the non-dimensional engine thrust settings ( $T_4/T_2$ ) are estimated with the equations listed in §S2.2:

Eq. (S1): 
$$\frac{F}{F_{00,\text{max}}} = \frac{0.328}{1.049} = 0.3127$$



Eq. (S2):  $P_2 = 23850 \left(1 + \frac{0.4}{2} \times 0.65^2\right)^{\frac{1.4}{0.4}} = 36581.62 \text{ Pa}$

Eq. (S3):  $T_2 = 215 \left(1 + \frac{0.4}{2} \times 0.65^2\right) = 233.17 \text{ K}$

Eq. (S4):  $P_3 = 36581.62 \times (27.1 - 1)(0.3127) + 36581.62 = 335121.12 \text{ Pa}$

Eq. (S5):  $T_3 = 233.17 \times \left(\frac{335121.12}{36581.62}\right)^{\frac{0.4}{1.4(0.9)}} = 471.03 \text{ K}$

Eq. (S7) & (S8):  $AFR_{\text{cruise}} = (0.0121(0.3127) + 0.008)^{-1} \times \left(\frac{233.17}{288.15}\right) = 68.672$

Eq. (S5):  $T_4 = \frac{(68.672 \times 1005 \times 471.03) + (43.2 \times 10^6)}{1250(1 + 68.672)} = 868.13 \text{ K}$

$$\left(\frac{T_4}{T_2}\right)_{\text{Cruise}} = \frac{868.13}{233.17} = 3.723$$

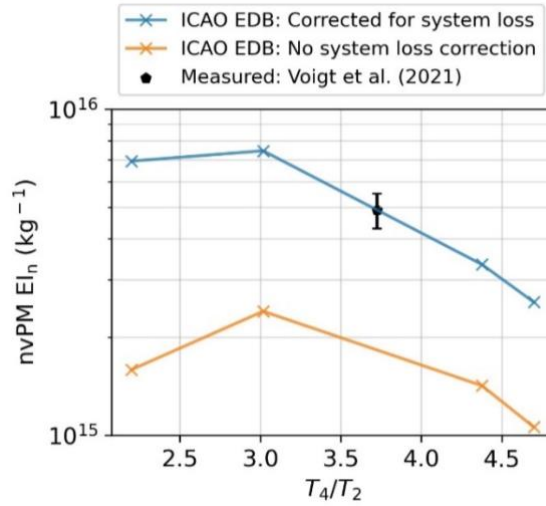

**Figure S8: nvPM EI<sub>n</sub> emissions profile from the ICAO EDB and cruise EI<sub>n</sub> measurements from Voigt et al. (2021) versus the non-dimensional engine thrust settings ( $T_4/T_2$ ). The nvPM EI<sub>n</sub> is measured from an IAE V2527-A5 engine, which powers the Airbus A320.**

An interpolation of  $\left(\frac{T_4}{T_2}\right)_{\text{Cruise}}$  against values from the ICAO EDB estimates the nvPM EI<sub>n</sub> to be  $5.32 \times 10^{15} \text{ kg}^{-1}$ . The estimated nvPM EI<sub>n</sub> ( $5.32 \times 10^{15} \text{ kg}^{-1}$ ) is within the one standard deviation range of the measured EI<sub>n</sub> ( $4.9 \pm 0.6 \times 10^{15} \text{ kg}^{-1}$ ), as shown in Fig. S8. We note that the cruise nvPM EI<sub>n</sub> measurements from Moore et al. (2017) is not included in this validation because nvPM measurements from the engine type (DC-8, CFM56-2-C1) is not available in the ICAO EDB database.

### **S3 Correction to ERA5 humidity fields**

In this study, contrails are simulated with two European Centre for Medium-Range Weather Forecast (ECMWF) ERA5 reanalysis datasets, including the high-resolution realization (ERA5 HRES) and 10-member ensemble. It is the ECMWF's fifth-generation reanalysis dataset and a successor to the ERA5-Interim reanalysis (Hersbach et al., 2020). The ERA5 HRES provides the nominal meteorology and radiation data at a very high spatiotemporal resolution ( $0.25^\circ \times 0.25^\circ \times 37$  pressure levels  $\times 1$  h), while the ERA5 10-member ensemble has a lower spatiotemporal resolution ( $0.5^\circ \times 0.5^\circ \times 37$  levels  $\times 3$  h) and is made up of: (i) one control member that is also used to initialise the HRES; and (ii) nine perturbed members where they are initialised with random perturbations added to the observations (Hersbach et al., 2020). Therefore, the ensemble spread that is provided by the ERA5 10-member ensemble represent uncertainties of the observing system that is provided to the data assimilation system and model state uncertainties in the reanalysis.

Existing studies have identified limitations of the humidity fields provided by the ECMWF ERA5 products: (i) it generally predicts ice supersaturated regions (ISSR) that are weakly supersaturated ( $\text{RHi} \approx 100\%$ ); and (ii) do not predict regions with very high ice supersaturation (relative humidity with respect to ice,  $\text{RHi} > 120\%$ ) (Gierens et al., 2020; Schumann et al., 2021; Rädcl and Shine, 2010; Reutter et al., 2020; Tompkins et al., 2007). Recent studies that compared the ERA5 humidity fields with in-situ measurements confirmed that the ERA5 products underpredict the  $\text{RHi}$  inside ISSRs (Reutter et al., 2020; Gierens et al., 2020), and two main factors likely contribute to this phenomenon: (i) the sub-grid scale variability that cannot currently be resolved from the spatiotemporal resolution of existing meteorological datasets; and (ii) simplified assumptions on the relaxation time, where all the supersaturated humidity in a grid cell is converted into ice, reaching equilibrium ( $\text{RHi} \approx 100\%$ ) after one time step (Tompkins et al., 2007; Koop et al., 2000).

The identified limitations in the ERA5 humidity fields could lead to significant errors in the simulated contrail lifetime and climate forcing (Agarwal et al., 2022; Gierens et al., 2020). Previous studies that used the contrail cirrus prediction model (CoCiP) accounted for these limitations by uniformly increasing the ERA5 humidity fields by dividing it with an enhancement factor ( $RH_i/RH_{ic}$ ) with  $RH_{ic} = 0.90$  (Schumann, 2012; Schumann et al., 2015; Teoh et al., 2020b) and  $RH_{ic} = 0.95$  in Schumann et al. (2021), and differences in the  $RH_{ic}$  enhancement factor was attributed to different meteorological products and its spatiotemporal resolution. This approach of uniformly enhancing the ERA5 humidity fields ( $RH_{ic} < 1$ ) can address limitation (i) by enhancing the mean  $RH_i$  inside ISSRs; but it could overestimate the ISSR coverage and contrail formation (Agarwal et al., 2022), and does not reproduce an  $RH_i$  distribution that is consistent with in-situ measurements (Schumann et al., 2021; Reutter et al., 2020).

**Table S2: Comparison of the agreement in ISSR occurrence that is measured from the IAGOS campaign in 2019 versus those derived from the ERA5 HRES with a range of  $RH_{ic}$  factors.  $Y_{IAGOS}$  indicates that the waypoint is in ISSR ( $RH_i > 100\%$ ) according to the in-situ IAGOS measurements, while  $N_{IAGOS}$  indicates the opposite. The same notations are used to assess the statistics for the ERA5 HRES.**

| <b><math>RH_{ic}</math></b> | <b><math>Y_{IAGOS}/Y_{HRES}</math><br/>(%)</b> | <b><math>N_{IAGOS}/N_{HRES}</math><br/>(%)</b> | <b><math>Y_{IAGOS}/N_{HRES}</math><br/>(%)</b> | <b><math>N_{IAGOS}/Y_{HRES}</math><br/>(%)</b> | <b>Equitable Threat Score<br/>(ETS)<sup>a</sup></b> |
|-----------------------------|------------------------------------------------|------------------------------------------------|------------------------------------------------|------------------------------------------------|-----------------------------------------------------|
| <b>0.90</b>                 | <b>10.5</b>                                    | <b>79.3</b>                                    | <b>3.29</b>                                    | <b>6.86</b>                                    | 0.444                                               |
| 0.91                        | 10.3                                           | 79.7                                           | 3.48                                           | 6.48                                           | 0.446                                               |
| 0.92                        | 10.2                                           | 80.1                                           | 3.64                                           | 6.15                                           | 0.447                                               |
| 0.93                        | 9.94                                           | 80.4                                           | 3.86                                           | 5.82                                           | 0.445                                               |
| 0.94                        | 9.74                                           | 80.7                                           | 4.06                                           | 5.50                                           | 0.444                                               |
| <b>0.95</b>                 | <b>9.49</b>                                    | <b>81.0</b>                                    | <b>4.31</b>                                    | <b>5.19</b>                                    | 0.440                                               |
| 0.96                        | 9.22                                           | 81.4                                           | 4.58                                           | 4.80                                           | 0.437                                               |
| 0.97                        | 8.93                                           | 81.8                                           | 4.87                                           | 4.45                                           | 0.432                                               |
| 0.98                        | 8.57                                           | 82.1                                           | 5.23                                           | 4.12                                           | 0.422                                               |
| 0.99                        | 8.20                                           | 82.4                                           | 5.60                                           | 3.79                                           | 0.411                                               |
| <b>1.00</b>                 | <b>7.75</b>                                    | <b>82.7</b>                                    | <b>6.05</b>                                    | <b>3.47</b>                                    | 0.394                                               |
| 1.01                        | 7.04                                           | 83.2                                           | 6.76                                           | 3.04                                           | 0.365                                               |
| 1.02                        | 6.45                                           | 83.6                                           | 7.35                                           | 2.62                                           | 0.343                                               |
| 1.03                        | 5.87                                           | 83.9                                           | 7.93                                           | 2.26                                           | 0.318                                               |
| 1.04                        | 5.38                                           | 84.3                                           | 8.42                                           | 1.89                                           | 0.298                                               |
| 1.05                        | 4.96                                           | 84.6                                           | 8.84                                           | 1.61                                           | 0.280                                               |

<sup>a</sup>: The equitable threat score (ETS) is calculated based on Appendix A of Gierens et al. (Gierens et al., 2020). For interpretation, an  $ETS = 1$  implies that all the in-situ IAGOS measurements matches up with the ERA5 HRES ( $Y_{IAGOS}/Y_{HRES} + N_{IAGOS}/N_{HRES} = 100\%$ ); an  $ETS = 0$  implies a completely random relationship between the IAGOS and ERA5 HRES; while an  $ETS < 0$  implies an inverse relationship between the IAGOS and ERA5 HRES.

248 We used in-situ measurements from the In-Service Aircraft for a Global Observing System  
 249 (IAGOS) campaign (Petzold et al., 2020; Boulanger et al., 2022) to develop a new correction  
 250 methodology to address the identified limitations in the ERA5 humidity fields. For each flight,  
 251 the IAGOS dataset measures the ambient temperature and humidity every 4 s, and we  
 252 resampled the data to produce flight segments with a temporal resolution of 60 s to reduce  
 253 autocorrelation in the atmospheric measurements (Gierens et al., 2020). We then filter the  
 254 dataset to only include waypoints that are within the spatiotemporal domain of the NATS  
 255 dataset (-50°W, 40°N, -10°W, 75°N), and this amounted to 262 distinct flights and 43,919  
 256 waypoints for 2019. For each waypoint, the RH<sub>i</sub> is: (i) calculated from in-situ temperature and  
 257 humidity measurements; and (ii) estimated from the ERA5 meteorology,

$$\text{RH}_i = \frac{q_{\text{amb}} \times P_{\text{amb}} \times R_1}{p_{\text{ice}}(T_{\text{amb}}) \times R_0}. \quad (\text{S9})$$

258  $P_{\text{amb}}$  is the pressure altitude for each waypoint (in units of Pa),  $R_1$  (461.51 J kg<sup>-1</sup> K<sup>-1</sup>) and  $R_0$   
 259 (287.05 J kg<sup>-1</sup> K<sup>-1</sup>) are the real gas constant for water vapour and air respectively, and  $p_{\text{ice}}$  is the  
 260 saturation pressure over ice water surfaces (Sonntag, 1994),

$$p_{\text{ice}}[\text{Pa}] = 100 \exp \left[ \frac{-6024.5282}{T_{\text{amb}}} + 24.721994 + 0.010613868 T_{\text{amb}} - 1.3198825 \times \right. \\ \left. 10^{-5} T_{\text{amb}}^2 - 0.49382577 \ln(T_{\text{amb}}) \right], \quad (\text{S10})$$

261 where  $q_{\text{amb}}$  is the specific humidity (kg-H<sub>2</sub>O/kg-air) and  $T_{\text{amb}}$  is the ambient temperature, and a  
 262 quadrilinear interpolation provides the  $q_{\text{amb}}$  and  $T_{\text{amb}}$  from the ERA5 datasets. Different  
 263 parameterisations of  $p_{\text{ice}}$  are available (Sonntag, 1994; Murphy and Koop, 2005), and an earlier  
 264 comparison between these parameterised functions showed that the differences in  $p_{\text{ice}}$  is less  
 265 than 0.5% for temperatures greater than -100°C (Appendix C of Schumann (2012)). A more

recent assessment of the different relationships on the saturation pressure is given by Vömel (2016).

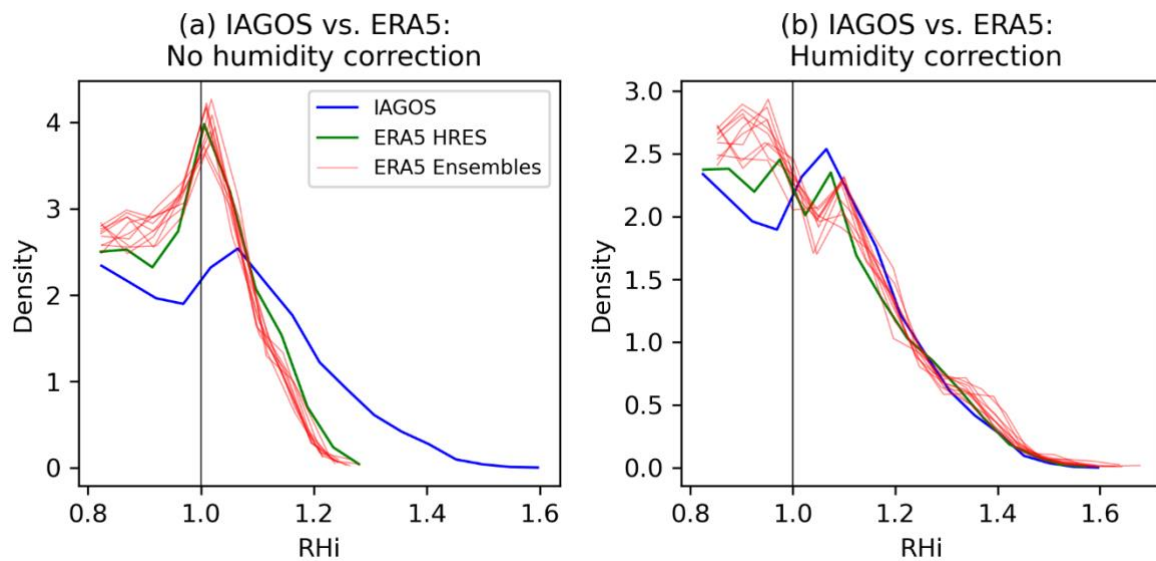

**Figure S9: Probability density function of the RH<sub>i</sub> for the IAGOS waypoints that is calculated from in-situ temperature and humidity measurements versus those estimated from the ERA5 HRES and ERA5 10-member ensemble (a) without and (b) with humidity correction.**

Two approaches are used to compare the goodness of fit between the in-situ and ERA5-derived RH<sub>i</sub>, including the ability for the ERA5 products to correctly predict: (i) the location of ISSRs ( $\text{RH}_i \geq 100\%$ ) and dry regions ( $\text{RH}_i < 100\%$ ), which determines contrail formation; and (ii) the RH<sub>i</sub> magnitude inside ISSRs, which influences the contrail properties, lifetime, and climate forcing. Table S2 summarises the ability of ERA5 HRES to correctly predict the waypoints inside/outside ISSRs versus a range of RH<sub>ic</sub> enhancement factors that covers the values used in previous studies; while Fig. S9a compares the RH<sub>i</sub> distribution from the ERA5 HRES with no humidity correction with in-situ measurements. Without applying any humidity correction ( $\text{RH}_{ic} = 1$ ), our results show that:

1. the ERA5 HRES correctly predicts the formation/absence of contrails for 90.5% of the IAGOS waypoints in the sample (Table S2),

2. the false negative rate ( $Y_{\text{IAGOS}}/N_{\text{HRES}}$ , where IAGOS indicates ISSR, but not in the ERA5 humidity fields) is 1.8 times higher than the false positive rate ( $N_{\text{IAGOS}}/Y_{\text{HRES}}$ , where ERA5 indicates ISSR, but not the IAGOS measurements), at 6.05% versus 3.47% (Table S2), which suggests that the uncorrected ERA5 could underestimate the ISSR occurrence,
3. RH<sub>i</sub> derived from the ERA5 HRES shows a peak at around 105% RH<sub>i</sub> and do not exceed 125% RH<sub>i</sub>, while the RH<sub>i</sub> derived from in-situ measurements more closely resembles a negative exponential/power-law distribution with RH<sub>i</sub> values of up to 160% (Fig. S9a), and
4. Applying a uniform enhancement factor of up to  $\text{RH}_{\text{ic}} < 0.92$  can improve the agreement between the IAGOS and ERA5, as indicated by the Equitable Threat Score (ETS). However, applying an  $\text{RH}_{\text{ic}} < 0.96$  to the North Atlantic region causes the false positive rate ( $N_{\text{IAGOS}}/Y_{\text{HRES}}$ ) to be greater than the false negative rate ( $Y_{\text{IAGOS}}/N_{\text{HRES}}$ ), potentially overestimating the contrail formation, persistence, and climate forcing (Table S2).

These results are consistent with earlier studies which found the ERA5 HRES to generally predict ISSR regions that are weakly supersaturated ( $\text{RH}_i \approx 100\%$ ) (Gierens et al., 2020; Schumann et al., 2021; Rädcl and Shine, 2010; Reutter et al., 2020; Tompkins et al., 2007); and the potential underestimation of ISSR occurrence, highlighted in Point (2), is in contrast to a recent study that compared the ERA5 RH<sub>i</sub> with radiosonde measurements (Agarwal et al., 2022).

Based on these results, we developed a new approach to correct the ERA5 humidity fields:

- **STEP 1:** Scale the ERA5 humidity fields in the spatial domain by dividing by a factor of  $a$ ,



- **STEP 2:** Enhance the RH<sub>i</sub> of any data points with ISSRs (RH<sub>i</sub> > 100%) using a power-law function with coefficient  $b$  and limit the RH<sub>i</sub> to an upper bound of 165%, in-line with observations from the IAGOS dataset.

$$\text{RH}_{i\text{Corrected}} = \begin{cases} \frac{\text{RH}_i}{a} & , \text{when } \left(\frac{\text{RH}_i}{a}\right) \leq 1 \\ \min\left(\left(\frac{\text{RH}_i}{a}\right)^b, 1.65\right) & , \text{when } \left(\frac{\text{RH}_i}{a}\right) > 1 \end{cases} \quad (\text{S11})$$

The parameters  $a$  and  $b$  are optimised by minimising the Cramer-von Mises (CvM) test statistic (Parr and Schucany, 1980), a measure of the goodness-of-fit between two empirical distributions, so that the probability density function of the ERA5-derived RH<sub>i</sub> inside ISSRs (RH<sub>i</sub> > 100%) resembles the IAGOS in-situ measurements,

$$T = \frac{1}{12n} + \sum_{i=1}^n \left[ \frac{2i-1}{2n} - F(x_i) \right]^2, \quad (\text{S12})$$

where  $n$  is the sample size and  $F(x_i)$  is the cumulative density function of the sample (ERA5 RH<sub>i</sub>) calculated relative to the distribution of in-situ measurements from IAGOS, with values ranging between 0 and 1. A lower  $T$  value indicates an improved goodness-of fit (Parr and Schucany, 1980), and this approach improves the robustness of the test relative to the more commonly used Kolmogorov-Smirnov test because it accounts for the whole distribution function.

Using the SciPy Python package, we estimate  $a = 0.9779$  and  $b = 1.635$  for the ERA5 HRES. Figure S10a shows the CvM test statistic against a range of  $b$  values for the ERA5 HRES and shows that the optimal  $b$  value (1.635) is a global minimum. We note that the optimised  $a$  and  $b$  coefficients are specific for the North Atlantic region and might not be valid for other regions. After correcting the humidity fields, the RH<sub>i</sub> distribution provided by the ERA5 HRES now resembles the IAGOS in-situ measurements (Fig. S9b). Figure S11 compares the spatial

distribution of the ERA5 humidity fields before and after applying the humidity correction, as well as previous approaches that corrected the humidity fields by division with a uniform enhancement factor of  $RH_{ic}$ : the new correction approach maintains the ISSR structure, and it now accounts for regions with very high ice supersaturation ( $RH_i > 120\%$ ). In contrast, the previous correction approaches ( $RH_{ic} = 0.90$  and  $0.95$ ) do not adequately capture localised regions with very high  $RH_i$ , and the larger ISSR coverage area ( $RH_{ic} < 0.96$ ) could overestimate the contrail formation and climate forcing (Table S2).

The same humidity correction approach is applied to the ERA5 10-member ensemble. Without applying any correction, we found that the  $RH_i$  derived from the ERA5 10-member ensemble is, on average, 2.5% lower than the ERA5 HRES, which can likely be attributed to its lower spatiotemporal resolution. The optimal  $a$  and  $b$  coefficients are then estimated for each ensemble member, and we applied the median coefficients to all the ensemble members ( $a = 0.9666$  and  $b = 1.776$ ). Figure S9b shows the  $RH_i$  distribution inside ISSRs after the humidity correction is applied to the ERA5 10-member ensemble, which now resembles the IAGOS in-situ measurements.

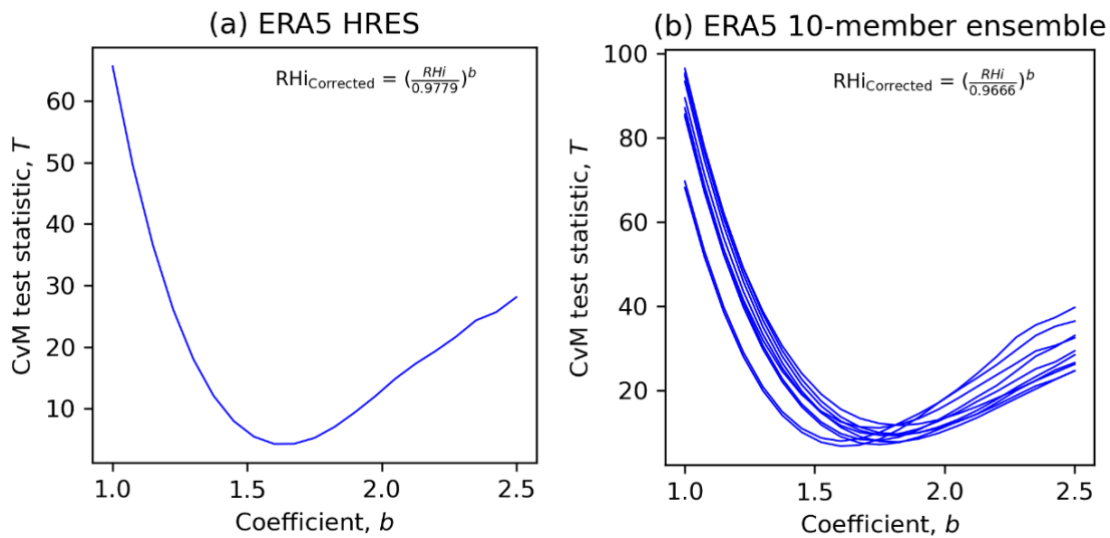

**Figure S10: The CvM test statistic versus a range of  $b$  coefficient that is used in Eq. (S11) to correct for the humidity fields in the (a) ERA5 HRES; and (b) ERA5 10-member ensemble.**

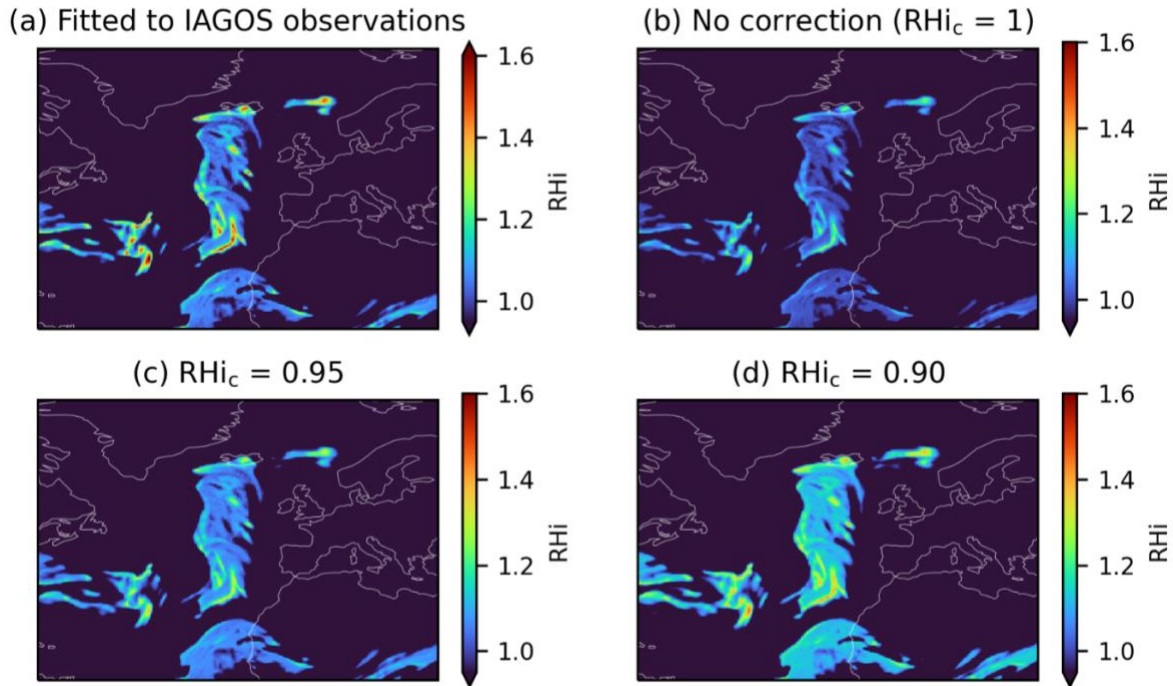

Figure S11: Spatial distribution of the humidity fields from the ERA5 HRES (a) with and (b) without humidity correction; and for previous approaches that uniformly enhanced the humidity fields by dividing with (c)  $RH_{ic} = 0.95$ ; and (d)  $RH_{ic} = 0.90$  at pressure level 20,000 Pa (38,500 feet) and 2-January-2019 20:00:00 (UTC). Basemap plotted using Cartopy 0.20.2 (C) Natural Earth; license: public domain.

Table S3: Comparison of the agreement in ISSR occurrence that is measured from the IAGOS campaign in 2019 versus those derived from the median of the ERA5 10-member ensemble with a range of  $RH_{ic}$  boosting factors.  $Y_{IAGOS}$  indicates that the waypoint is in ISSR ( $RH_i > 100\%$ ) according to in-situ IAGOS measurements, while  $N_{IAGOS}$  indicates the opposite. The same notations are used to assess the statistics for the ERA5 10-member ensemble.

| $RH_{ic}$   | $Y_{IAGOS}/Y_{ENS}$<br>(%) | $N_{IAGOS}/N_{ENS}$<br>(%) | $Y_{IAGOS}/N_{ENS}$<br>(%) | $N_{IAGOS}/Y_{ENS}$<br>(%) | Equitable Threat Score<br>(ETS) <sup>a</sup> |
|-------------|----------------------------|----------------------------|----------------------------|----------------------------|----------------------------------------------|
| <b>0.90</b> | <b>10.1</b>                | <b>79.3</b>                | <b>3.67</b>                | <b>6.93</b>                | 0.423                                        |
| 0.91        | 9.89                       | 79.7                       | 3.91                       | 6.51                       | 0.422                                        |
| 0.92        | 9.62                       | 80.1                       | 4.18                       | 6.14                       | 0.419                                        |
| 0.93        | 9.35                       | 80.5                       | 4.45                       | 5.75                       | 0.416                                        |
| 0.94        | 9.07                       | 80.9                       | 4.73                       | 5.34                       | 0.413                                        |
| <b>0.95</b> | <b>8.78</b>                | <b>81.2</b>                | <b>5.02</b>                | <b>4.96</b>                | 0.408                                        |
| 0.96        | 8.45                       | 81.6                       | 5.35                       | 4.60                       | 0.401                                        |
| 0.97        | 8.12                       | 82.0                       | 5.68                       | 4.21                       | 0.394                                        |
| 0.98        | 7.76                       | 82.4                       | 6.04                       | 3.83                       | 0.384                                        |
| 0.99        | 7.39                       | 82.8                       | 6.41                       | 3.41                       | 0.376                                        |
| <b>1.00</b> | <b>6.96</b>                | <b>83.2</b>                | <b>6.84</b>                | <b>2.99</b>                | 0.363                                        |
| 1.01        | 6.37                       | 83.6                       | 7.43                       | 2.60                       | 0.338                                        |
| 1.02        | 5.73                       | 84.0                       | 8.08                       | 2.16                       | 0.312                                        |
| 1.03        | 5.11                       | 84.4                       | 8.69                       | 1.83                       | 0.283                                        |
| 1.04        | 4.54                       | 84.6                       | 9.26                       | 1.56                       | 0.255                                        |
| 1.05        | 3.96                       | 84.9                       | 9.84                       | 1.32                       | 0.225                                        |

<sup>a</sup>: The equitable threat score (ETS) is calculated based on Appendix A of Gierens et al. (Gierens et al., 2020). For interpretation, an ETS = 1 implies that all the in-situ IAGOS measurements matches up with the median of the ERA5 10-member ensemble ( $Y_{IAGOS}/Y_{ENS} + N_{IAGOS}/N_{ENS} = 100\%$ ); an ETS = 0 implies a completely random relationship between the IAGOS and ERA5 ensembles; while an ETS < 0 implies an inverse relationship between the IAGOS and ERA5 ensembles.

Table S4 shows the agreement of the ISSR occurrence between the IAGOS in-situ measurements versus those derived from the corrected ERA5 humidity fields, while Fig. S9 shows the corrected RH<sub>i</sub> distribution relative to in-situ measurements. While the new humidity correction approach is an improvement relative to previous approaches, we acknowledge its inherent limitations where: (i) the optimal coefficients for  $a$  and  $b$  are only valid for the North Atlantic region; and (ii) it could introduce errors at an individual waypoint level because the optimisation was performed using the probability density function. Recent studies found that that the accuracy of ERA5-derived RH<sub>i</sub> has a seasonal and height dependence (Gierens et al., 2020; Reutter et al., 2020), and further research is currently ongoing among the community to quantify these uncertainties and explore various machine-learning techniques to improve the accuracy of the ERA5 humidity fields.

**Table S4: Comparison of the agreement in ISSR occurrence that is measured from the IAGOS campaign in 2019 versus those derived from the ERA5 HRES and 10-member ensemble where the humidity fields are corrected using Eq. (S11).**

| ERA5 Product              | Coefficients |       | $Y_{\text{IAGOS}}/Y_{\text{ERA5}}$<br>(%) | $N_{\text{IAGOS}}/N_{\text{ERA5}}$<br>(%) | $N_{\text{IAGOS}}/N_{\text{ERA5}}$<br>(%) | $N_{\text{IAGOS}}/N_{\text{ERA5}}$<br>(%) | ETS   |
|---------------------------|--------------|-------|-------------------------------------------|-------------------------------------------|-------------------------------------------|-------------------------------------------|-------|
|                           | $a$          | $b$   |                                           |                                           |                                           |                                           |       |
| <b>HRES</b>               | 0.9779       | 1.635 | 8.64                                      | 82.0                                      | 5.16                                      | 4.19                                      | 0.424 |
| <b>10-member Ensemble</b> | 0.9666       | 1.776 | 8.23                                      | 81.8                                      | 5.57                                      | 4.36                                      | 0.395 |

## S4 Conditions for forming strongly warming/cooling contrails

The contrail cirrus net RF exhibits significant year-on-year variability with a stronger dependence on meteorology than on the total flight distance (Fig. S12). Figure S13 shows the seasonal variations in the ISSR properties, which is a key factor contributing to seasonal variations in different contrail properties (Fig. 1, 3 and 4 in the main text, and Fig. S14). Figure S15 shows a large intersection between the ISSR and the North Atlantic Organised Track Structure (OTS) at 17-April-2017, which contributes to the outliers observed in the seasonal contrail statistics (Fig. 1 in the main text) around that time period.

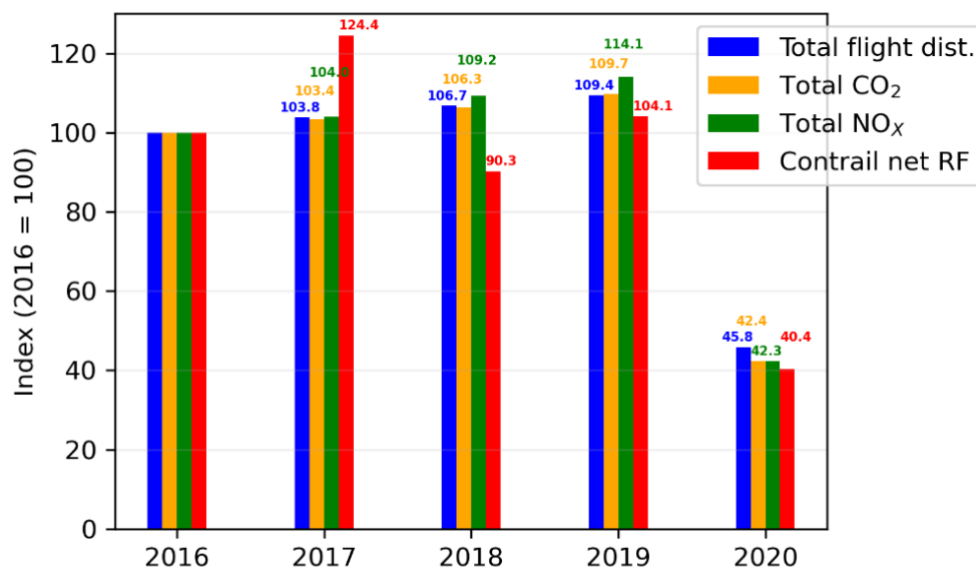

**Figure S12: The annual air traffic distance travelled, CO<sub>2</sub> and NO<sub>x</sub> emissions, and the contrail cirrus net RF in the North Atlantic region between 2016 and 2020, all of which are indexed to the 2016 values.**

Figure 3a (main text) shows the diurnal and seasonal effect of the contrail cirrus net RF, and large variabilities in the daytime contrail cirrus net RF is observed where it can be strongly warming (1086 mW m<sup>-2</sup>, 18-Sept-2019 14:00 UTC) or cooling (-594 mW m<sup>-2</sup>, 28-Aug-2019 10:00). For both periods, there is a contrail outbreak over the ocean (Fig. S17 left). Around 76.2% and 68.2% of the contrail area overlaps with natural cirrus in the warming and cooling period respectively (Fig. S17 right). A comparison of the local meteorology and various

contrail properties in both the warming and cooling periods are shown as a probability density function in Fig. S18.

Figure S19 shows that the mean contrail ice crystal radius ( $r_{ice}$ ) is correlated with the initial RHi ( $R = 0.661$ ), the difference between the ambient and SAC threshold temperature ( $dT_{SAC}$ ) ( $R = 0.551$ ), contrail optical depth ( $\tau_{contrail}$ ) ( $R = 0.585$ ), and negatively correlated with the contrail age ( $R = -0.350$ ). Figure S20 provides a breakdown of the aircraft types that are responsible for strongly warming ( $EF_{contrail} > 99^{th}$  percentile) and cooling ( $EF_{contrail} < 1^{st}$  percentile) contrails. It shows that 43.4% (17.4%) of strongly warming (cooling) contrails are formed by aircraft powered by the Phase 5 Rich-Quench-Lean combustor, and a very large wide-body aircraft is responsible for 18.0% (6.4%) of flights with strongly warming (cooling) contrails. Table S5 shows the relative contribution of different aircraft types to the contrail climate forcing.

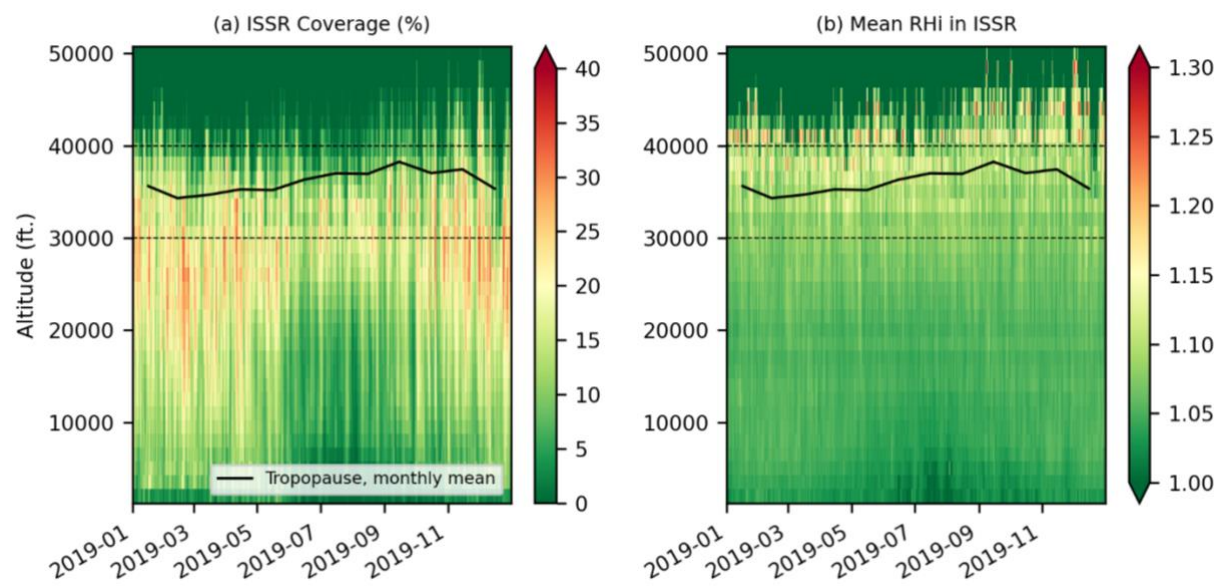

**Figure S13: ISSR properties vs. altitude in the North Atlantic region for 2019, including: (a) the percentage of coverage area, i.e., regions where the RHi > 1; and (b) the mean RHi in the ISSRs. The data is provided by the ERA5 HRES dataset. The black lines represent the monthly mean tropopause height calculated using the World Meteorological Organization (WMO) criteria where the lapse rate stays above  $-2 \text{ K km}^{-1}$ , and the black horizontal dashed lines represent the typical cruising altitudes of between 9 and 12 km.**



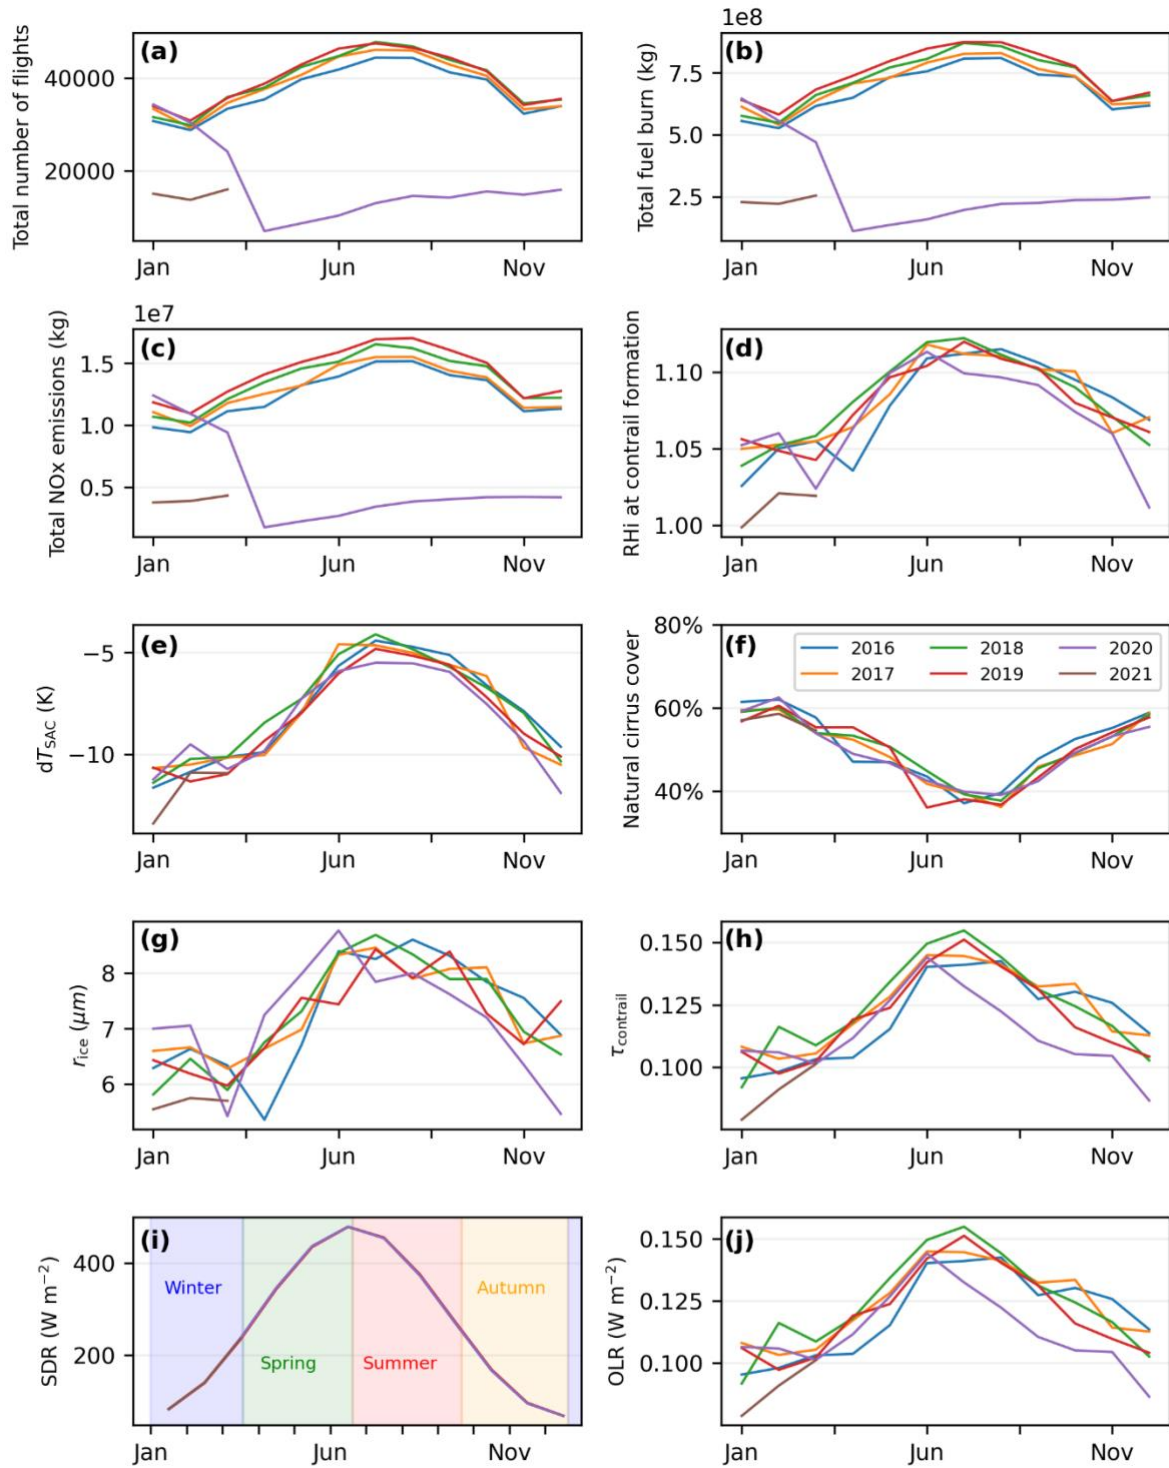

Figure S14: Monthly statistics in the North Atlantic region from January-2016 to March-2021, including the (a) total number of flights; (b) total fuel consumption; (c) total NO<sub>x</sub> emissions; (d) mean RH<sub>i</sub> when the contrail is formed; (e) mean differences between the ambient and Schmidt-Appleman criterion threshold temperature ( $dT_{SAC}$ ); (f) natural cirrus coverage; (g) mean ice crystal radius ( $r_{ice}$ ); (h) mean contrail optical depth ( $\tau_{contrail}$ ); (i) mean solar direct radiation (SDR); and (j) mean outgoing longwave radiation (OLR).

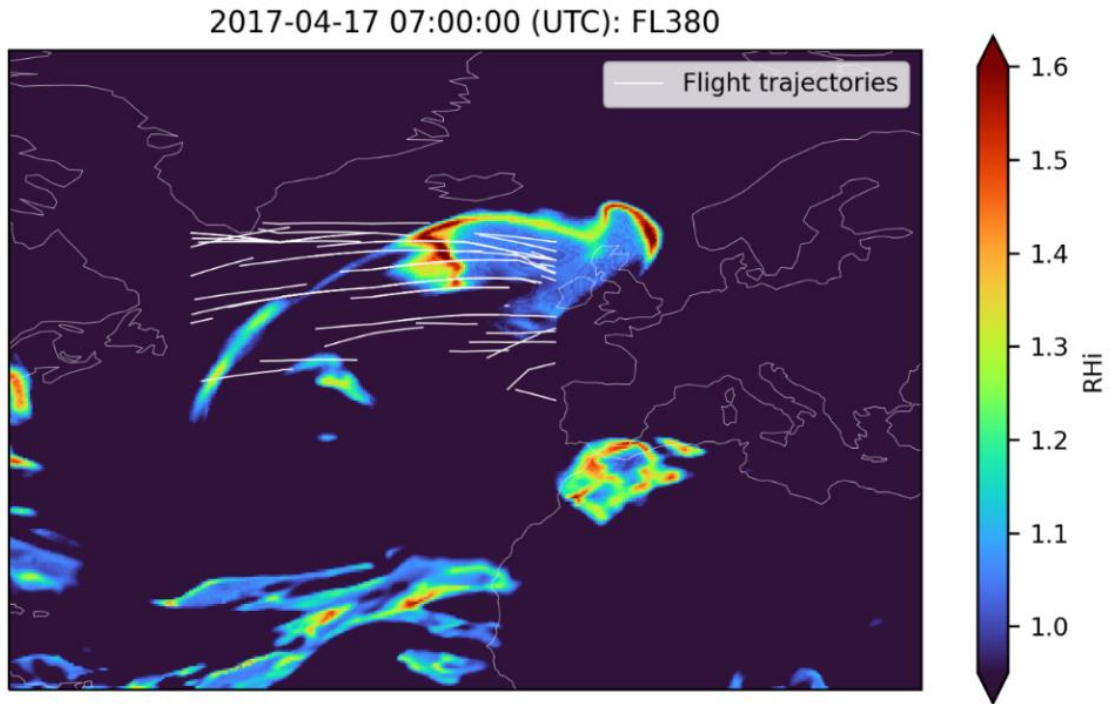

Figure S15: Spatial distribution of the corrected ERA5 humidity fields at flight level 380 (38,000 feet), 17-April-2017 07:00:00 (UTC). The white lines represent the flight trajectories that traversed the airspace in between 06:30:00 and 07:30:00 (UTC). During this time, 54% of the flight distance formed contrails and the contrail cirrus net RF is  $1430 \text{ mW m}^{-2}$ , which are shown as outliers in Fig. 2 (main text), and this is caused by the large intersection between the ISSR and the North Atlantic Organised Track Structure. Basemap plotted using Cartopy 0.20.2 (C) Natural Earth; license: public domain.

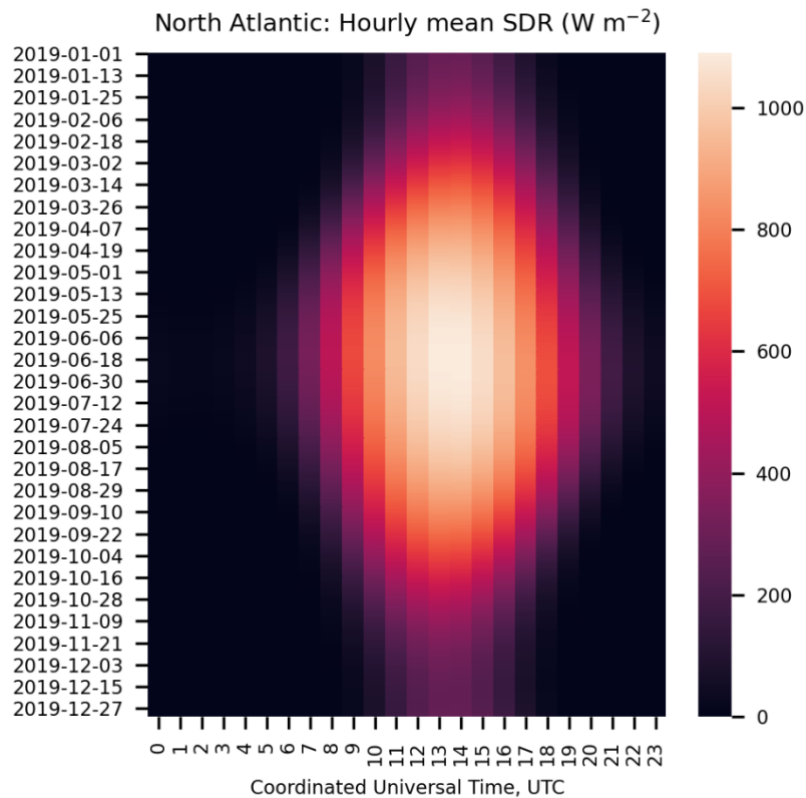

Figure S16: The hourly mean solar direct radiation (SDR) over the North Atlantic for each hour of 2019.

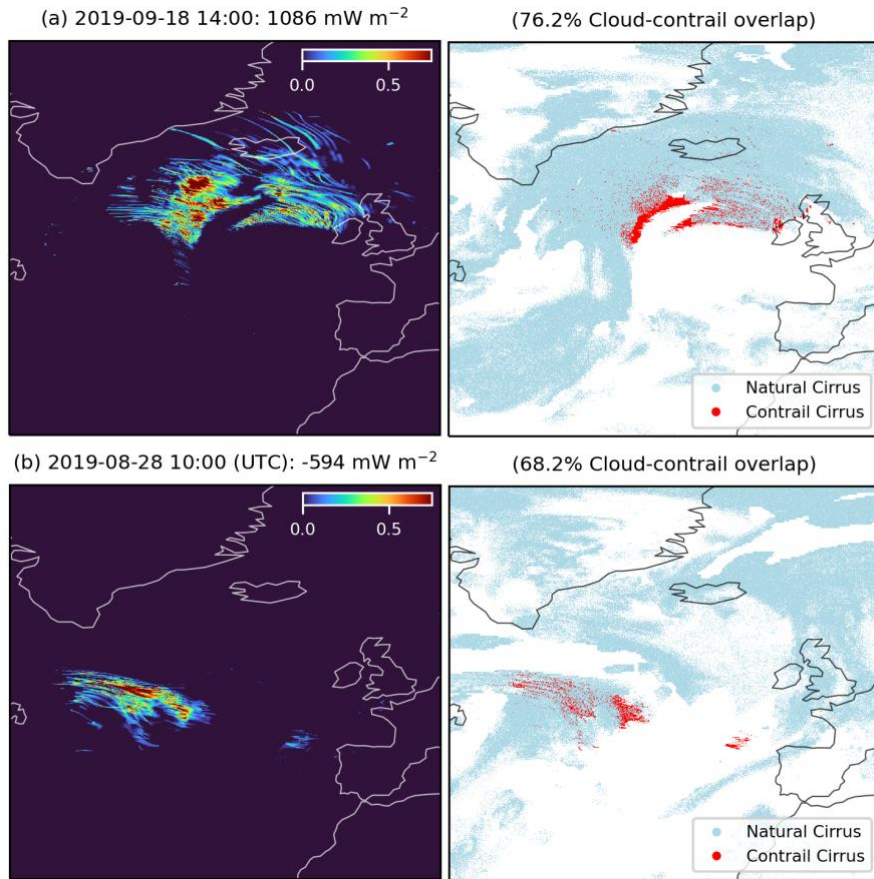

**Figure S17: Gridded contrail cirrus optical depth ( $\tau_{\text{contrail}}$ ) under clear sky conditions (left) and the location of natural cirrus and contrail cirrus (right) for the: (a) warming period at 18-Sept-2019 14:00 (UTC); and (b) cooling period at 28-Aug-2019 10:00. The contrail cirrus coverage (red points in the right subplots) are contrails that do not overlap with natural cirrus (refer to Section 2.5). Basemap plotted using Cartopy 0.20.2 (C) Natural Earth; license: public domain.**

## S5 Uncertainty analysis

Uncertainties provided by the ERA5 10-member ensemble are propagated to estimates of the annual emissions and contrail properties for 2019. Table S6 summarises the 2019 air traffic, emissions, and contrail statistics for each of the ERA5 10-member ensemble. The properties of flights with strongly warming ( $\text{EF}_{\text{contrail}} > 99^{\text{th}}$  percentile for 2019) and cooling ( $\text{EF}_{\text{contrail}} < 1^{\text{st}}$  percentile) contrails derived from each ensemble member is presented in Fig. S21. The probability density functions are generally consistent with the nominal simulation (Fig. 4 in the main text), apart from the time of day where strongly warming/cooling contrails are formed.

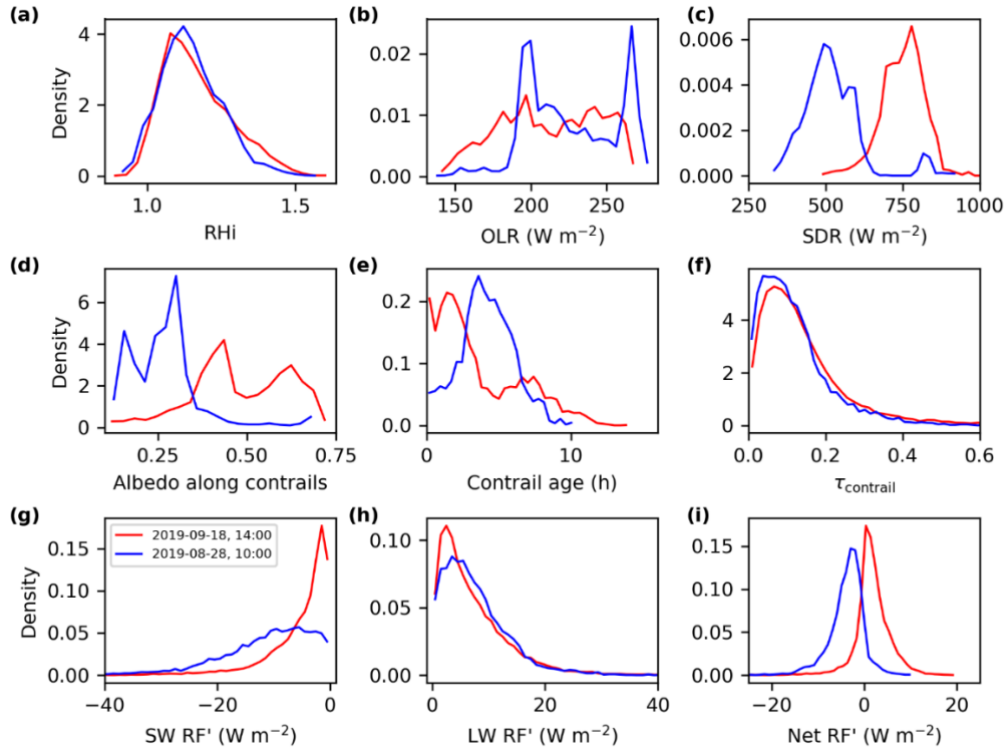

**Figure S18: Probability density function for the local meteorology, radiation and contrail properties at the contrail waypoint level during the warming period at 18-Sept-2019 14:00 UTC (red lines) and the cooling period at 28-Aug-2019 10:00 (green lines).**

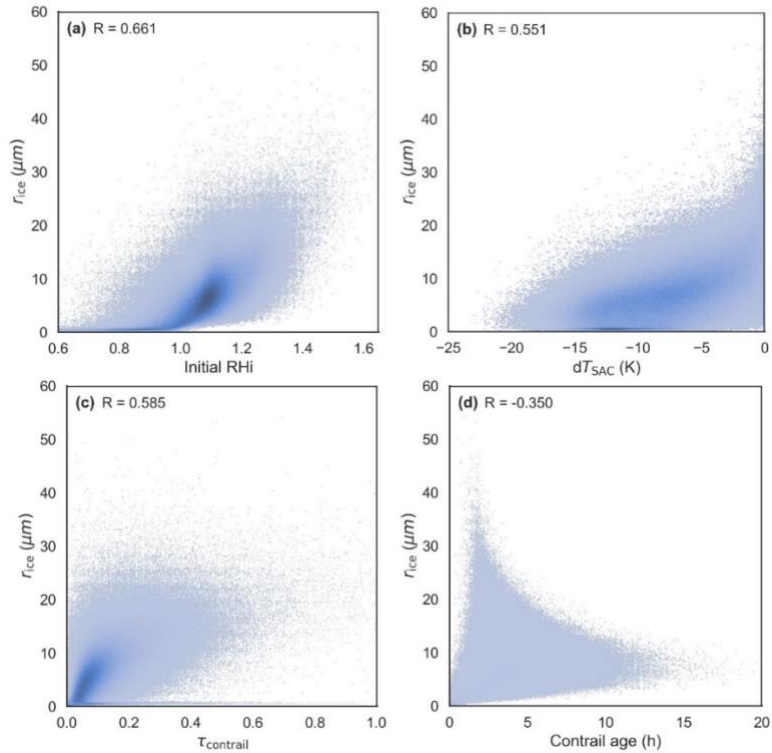

**Figure S19: Correlation between the mean ice crystal radius ( $r_{ice}$ ) versus the mean: (a) initial RHi at contrail formation; (b) difference between the ambient and SAC threshold temperature ( $dT_{SAC}$ ); (c) contrail optical depth ( $\tau_{contrail}$ ); and (d) contrail age for all contrail-forming flights.**

**Table S5: Statistics on the relative contribution of different aircraft types (anonymised) and their respective nvPM number emissions to the contrail climate forcing.**

| Aircraft Type               | % of all flights | % strongly warming contrails <sup>a</sup> | % strongly cooling contrails <sup>a</sup> | Mean nvPM number per distance travelled ( $\times 10^{12} \text{ m}^{-1}$ ) <sup>b</sup> | EF <sub>contrail</sub> per flight distance ( $\times 10^8 \text{ J m}^{-1}$ ) | EF <sub>contrail</sub> per passenger-km ( $\times 10^5 \text{ J m}^{-1}$ ) <sup>c</sup> |
|-----------------------------|------------------|-------------------------------------------|-------------------------------------------|------------------------------------------------------------------------------------------|-------------------------------------------------------------------------------|-----------------------------------------------------------------------------------------|
| Medium wide body (AC1)      | 7.8%             | 6.3%                                      | 3.7%                                      | 5.18                                                                                     | 0.90                                                                          | 4.86                                                                                    |
| Medium wide body (AC2)      | 11.1%            | 14.4%                                     | 12.3%                                     | 8.95                                                                                     | 1.13                                                                          | 5.46                                                                                    |
| Large wide body (AC3)       | 1.7%             | 0.9%                                      | 2.4%                                      | 6.48                                                                                     | 0.87                                                                          | 4.18                                                                                    |
| Large wide body (AC4)       | 1.6%             | 5.1%                                      | 2.1%                                      | 11.9                                                                                     | 1.58                                                                          | 6.09                                                                                    |
| Large wide body (AC5)       | 1.3%             | 2.5%                                      | 0.8%                                      | 10.1                                                                                     | 1.29                                                                          | 5.30                                                                                    |
| Large wide body (AC6)       | 0.4%             | 0.5%                                      | 0.2%                                      | 9.42                                                                                     | 1.21                                                                          | 4.42                                                                                    |
| Very large wide body (AC7)  | 2.4%             | 18.0%                                     | 6.4%                                      | 24.0                                                                                     | 2.18                                                                          | 4.51                                                                                    |
| Very large wide body (AC8)  | 7.4%             | 9.8%                                      | 9.6%                                      | 6.57                                                                                     | 1.05                                                                          | 4.07                                                                                    |
| Very large wide body (AC9)  | 1.9%             | 0.0%                                      | 0.7%                                      | 2.97                                                                                     | 0.50                                                                          | 1.64                                                                                    |
| Narrow body (AC10)          | 4.2%             | 0.8%                                      | 3.9%                                      | 5.39                                                                                     | 0.71                                                                          | 4.86                                                                                    |
| Medium wide body (AC11)     | 10.9%            | 8.7%                                      | 24.2%                                     | 8.32                                                                                     | 1.02                                                                          | 5.91                                                                                    |
| Very large wide body (AC12) | 10.6%            | 4.2%                                      | 4.9%                                      | 4.33                                                                                     | 0.79                                                                          | 3.33                                                                                    |
| Very large wide body (AC13) | 3.2%             | 0.7%                                      | 2.1%                                      | 4.92                                                                                     | 0.77                                                                          | 3.25                                                                                    |
| Very large wide body (AC14) | 8.8%             | 2.1%                                      | 10.0%                                     | 5.17                                                                                     | 0.73                                                                          | 2.46                                                                                    |
| Medium wide body (AC15)     | 4.8%             | 6.9%                                      | 1.9%                                      | 7.47                                                                                     | 1.22                                                                          | 6.72                                                                                    |
| Medium wide body (AC16)     | 6.9%             | 9.4%                                      | 4.5%                                      | 8.36                                                                                     | 1.18                                                                          | 5.40                                                                                    |
| Large wide body (AC17)      | 1.0%             | 2.5%                                      | 3.9%                                      | 14.9                                                                                     | 1.01                                                                          | 4.53                                                                                    |
| Medium wide body (AC18)     | 0.6%             | 0.0%                                      | 0.0%                                      | 2.57                                                                                     | 0.50                                                                          | 2.04                                                                                    |

<sup>a</sup>: Flights with strongly warming and cooling contrails are defined as contrail-forming flights with EF<sub>contrail</sub> > 99<sup>th</sup> percentile and EF<sub>contrail</sub> < 1<sup>st</sup> percentile respectively.

<sup>b</sup>: nvPM number emissions per distance travelled = nvPM EI<sub>n</sub> × fuel consumption per distance travelled

<sup>c</sup>: The EF<sub>contrail</sub> per passenger km is calculated by assuming a load factor of 75%.



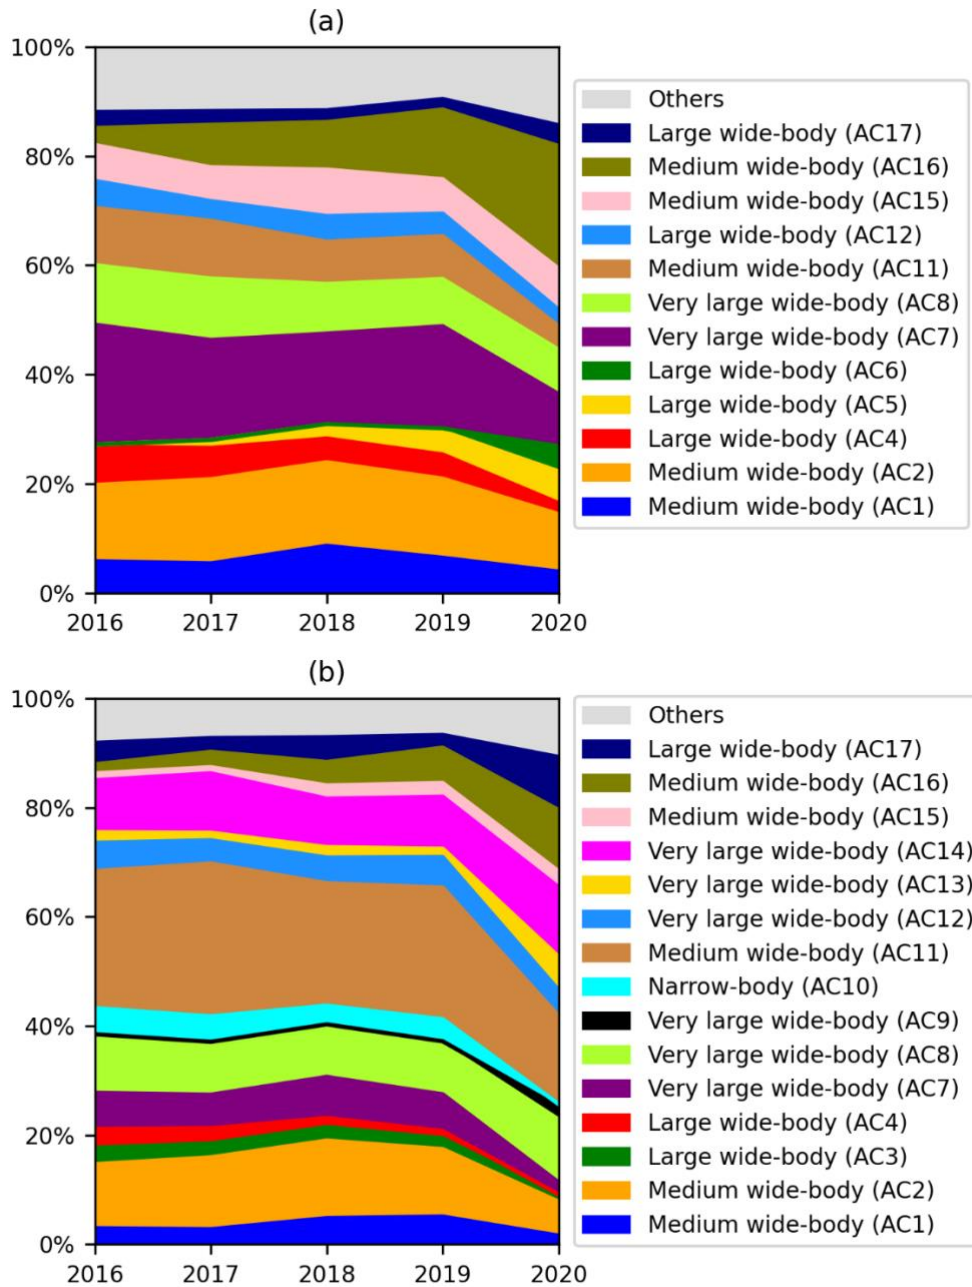

**Figure S20: Breakdown of the aircraft types that are responsible for strongly warming ( $EF_{\text{contrail}} > 99^{\text{th}}$  percentile) and cooling ( $EF_{\text{contrail}} < 1^{\text{st}}$  percentile) contrails that were formed in the North Atlantic region between 2016 and 2020.**



458 **Table S6: The annual air traffic, emissions, and contrail statistics for each of the ERA5 10-member ensemble for 2019**

| 2019 Ensemble members                                                            | 1      | 2      | 3      | 4      | 5      | 6      | 7      | 8      | 9      | 10     |
|----------------------------------------------------------------------------------|--------|--------|--------|--------|--------|--------|--------|--------|--------|--------|
| Total number of flights                                                          | 477923 | 477923 | 477923 | 477923 | 477923 | 477923 | 477923 | 477923 | 477923 | 477923 |
| Total flight distance (x10 <sup>9</sup> km)                                      | 1.184  | 1.184  | 1.184  | 1.184  | 1.184  | 1.184  | 1.184  | 1.184  | 1.184  | 1.184  |
| Total fuel burn (x10 <sup>9</sup> kg)                                            | 8.916  | 8.916  | 8.916  | 8.916  | 8.916  | 8.916  | 8.916  | 8.916  | 8.916  | 8.916  |
| Mean overall propulsion efficiency, $\eta$                                       | 0.3252 | 0.3252 | 0.3252 | 0.3252 | 0.3252 | 0.3252 | 0.3252 | 0.3252 | 0.3252 | 0.3252 |
| Total CO <sub>2</sub> emissions (x10 <sup>9</sup> kg)                            | 28.164 | 28.166 | 28.166 | 28.165 | 28.166 | 28.165 | 28.165 | 28.166 | 28.166 | 28.165 |
| Total NO <sub>x</sub> emissions (x10 <sup>9</sup> kg)                            | 0.1699 | 0.1700 | 0.1700 | 0.1699 | 0.1700 | 0.1699 | 0.1700 | 0.1700 | 0.1699 | 0.1699 |
| Mean nvPM EI <sub>n</sub> (x10 <sup>15</sup> kg <sup>-1</sup> )                  | 0.9393 | 0.9392 | 0.9392 | 0.9392 | 0.9392 | 0.9392 | 0.9392 | 0.9392 | 0.9392 | 0.9392 |
| Flights forming persistent contrails (%)                                         | 52.47  | 52.56  | 52.50  | 52.45  | 52.49  | 52.41  | 52.29  | 52.37  | 52.35  | 52.38  |
| Dist. forming persistent contrails (%)                                           | 16.45  | 16.16  | 16.19  | 16.14  | 16.17  | 16.10  | 16.07  | 16.07  | 16.07  | 16.10  |
| Mean contrail age (h)                                                            | 3.880  | 3.773  | 3.788  | 3.777  | 3.783  | 3.781  | 3.770  | 3.764  | 3.781  | 3.775  |
| Contrail optical depth, $\tau$                                                   | 0.1292 | 0.1242 | 0.1250 | 0.1244 | 0.1241 | 0.1237 | 0.1243 | 0.1241 | 0.1245 | 0.1235 |
| Contrail cirrus coverage (%)                                                     | 0.551  | 0.536  | 0.538  | 0.529  | 0.539  | 0.526  | 0.531  | 0.537  | 0.533  | 0.536  |
| SW RF (mW m <sup>-2</sup> )                                                      | -331.4 | -307.2 | -308.9 | -303.8 | -307.9 | -304.9 | -303.7 | -307.4 | -304.3 | -305.4 |
| LW RF (mW m <sup>-2</sup> )                                                      | 569.3  | 527.4  | 529.8  | 523.0  | 526.7  | 523.4  | 519.3  | 525.4  | 521.2  | 525.8  |
| Net RF (mW m <sup>-2</sup> )                                                     | 237.8  | 220.2  | 220.9  | 219.2  | 218.8  | 218.5  | 215.6  | 217.9  | 216.9  | 220.4  |
| EF <sub>contrail</sub> (x10 <sup>18</sup> J)                                     | 63.62  | 58.84  | 59.04  | 58.61  | 58.46  | 58.42  | 57.68  | 58.29  | 58.02  | 58.97  |
| EF <sub>contrail</sub> per flight distance (x10 <sup>8</sup> J m <sup>-1</sup> ) | 0.5375 | 0.4971 | 0.4988 | 0.4952 | 0.4939 | 0.4936 | 0.4874 | 0.4925 | 0.4902 | 0.4982 |
| EF <sub>contrail</sub> per contrail length (x10 <sup>8</sup> J m <sup>-1</sup> ) | 3.267  | 3.077  | 3.080  | 3.068  | 3.055  | 3.065  | 3.032  | 3.064  | 3.050  | 3.094  |
| % flights responsible for 80% EF <sub>contrail</sub>                             | 8.87   | 8.57   | 8.69   | 8.64   | 8.59   | 8.57   | 8.58   | 8.56   | 8.59   | 8.64   |

459

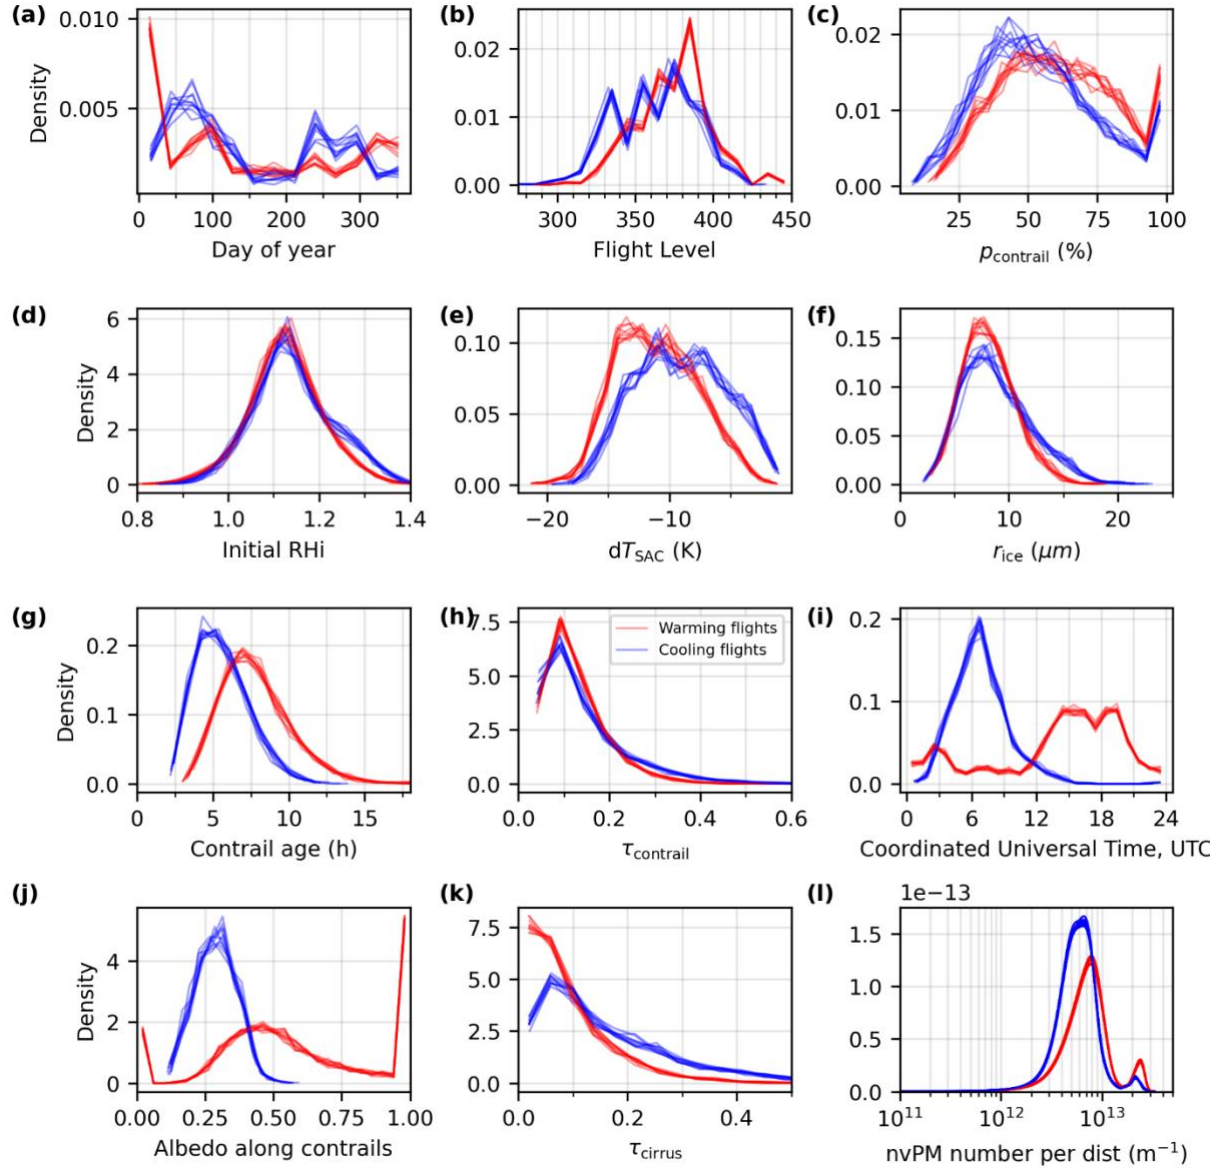

**Figure S21: Probability density function of the aircraft, meteorology, and contrail properties for flights with highly warming (red lines,  $\text{EF}_{\text{contrail}} > 99^{\text{th}}$  percentile) and cooling contrails (blue lines,  $\text{EF}_{\text{contrail}} < 1^{\text{st}}$  percentile) that is derived from the ERA5 10-member ensemble for 2019. Each line represents the probability density function from each ensemble member. The time-of-day variable in panel (i) represents the time when the flight is at its midpoint between the first and final recorded waypoints.**

## S6 Sensitivity analysis

Sensitivity analyses are also performed to compare the difference in mean contrail properties from individual flights between the nominal simulation versus: (i) a model run without the humidity correction applied to the ERA5 HRES (Fig. S22); (ii) a constant  $\text{EI}_n$  scenario of assuming  $10^{15} \text{ kg}^{-1}$  for all waypoints (Fig. S23); and (iii) the assumption where all the nvPM

activates into contrail ice crystals ( $p_{\text{activation}} = 1$ , Eq. 2 in the main text), independent of the  
 ambient temperature (Fig. S24). Table S7 summarises the change in emissions, meteorology  
 and contrail statistics for the different model runs used in the sensitivity analysis. The results  
 show that the contrail outputs are most sensitive to the ERA5 humidity correction, followed by  
 the nvPM  $EI_n$ , and is least sensitive to  $p_{\text{activation}}$ . Figure S25 compares the mean contrail lifetime  
 versus the mean RH<sub>i</sub> throughout the contrail's lifetime between the simulation with and without  
 humidity correction. The humidity correction (described in §S3) accounts for regions with very  
 high ice supersaturation (RH<sub>i</sub> > 120%), and contrails that persist under these conditions  
 generally have shorter lifetimes because of a larger  $r_{\text{ice}}$  and sedimentation rate.

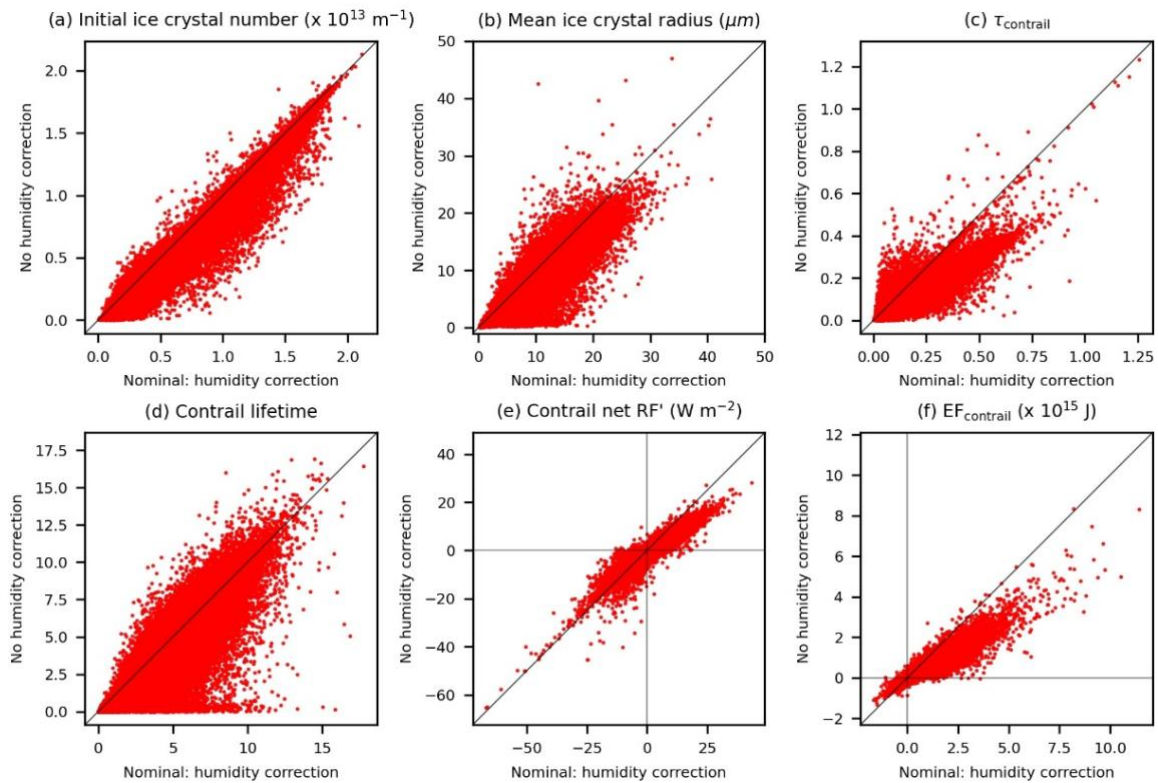

**Figure S22: Parity plots comparing the difference in contrail properties between the nominal simulation (ERA5 HRES with humidity correction) versus model run without humidity correction. Each data point represents the mean contrail properties for one flight, and flights are only included in this comparison if contrails are formed in both model runs ( $n = 253,654$ ).**

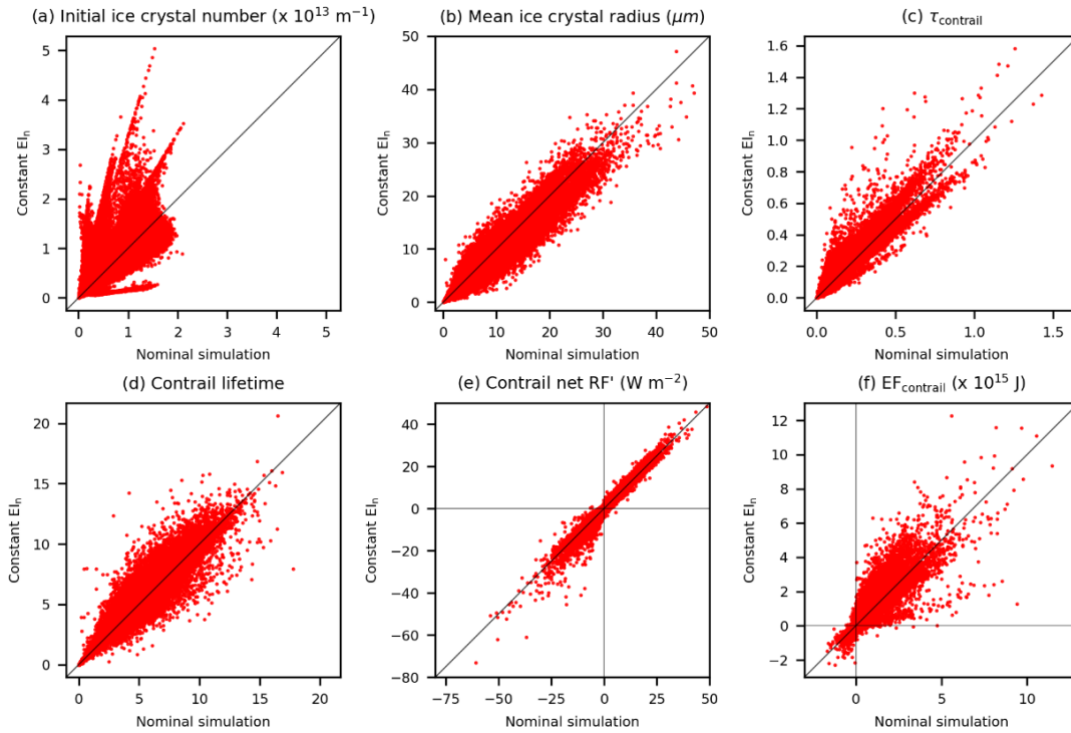

**Figure S23: Parity plots comparing the difference in contrail properties between the nominal simulation (ERA5 HRES) versus a constant  $EI_n$  scenario ( $10^{15} \text{ kg}^{-1}$  for all waypoints). Each data point represents the mean contrail properties for one flight, and all contrail-forming flights in 2019 are included in this comparison ( $n = 266,829$ ).**

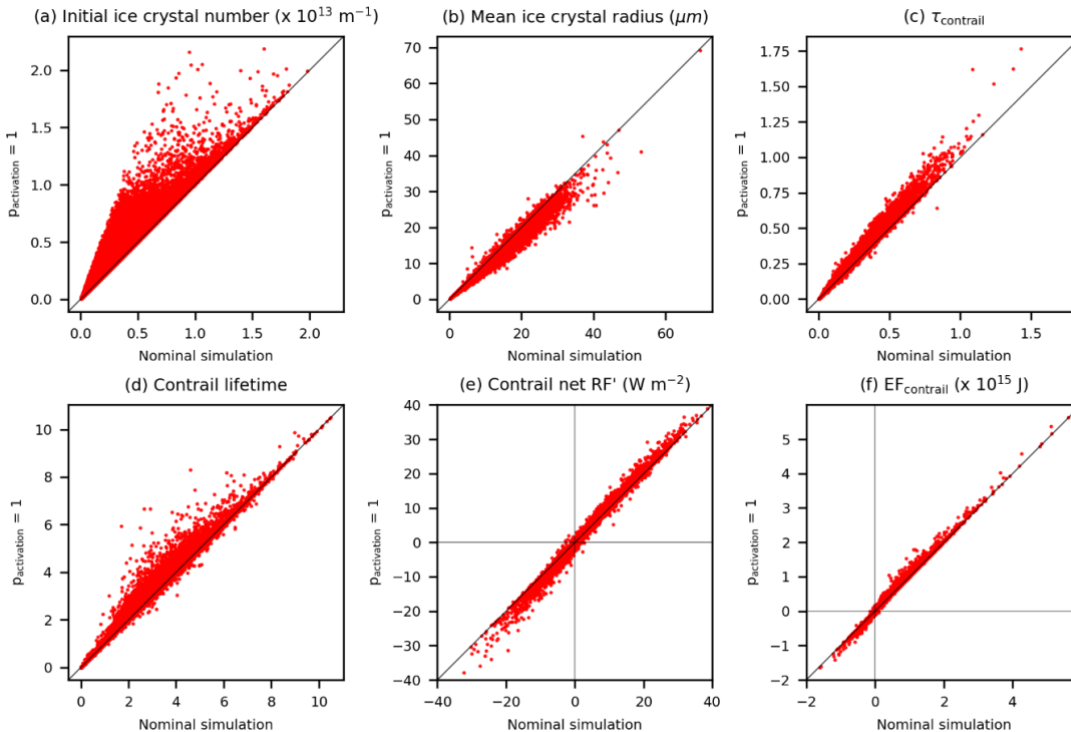

**Figure S24: Parity plots comparing the difference in contrail properties between the nominal simulation (ERA5 HRES) versus the assumption where all the nvPM activates into contrail ice crystals ( $p_{\text{activation}} = 1$ ). Each data point represents the mean contrail properties for one flight, and only flights in 2019 that form contrails near the Schmidt-Appleman threshold ( $T_{\text{amb}} - T_{\text{SAC}} > -5 \text{ K}$ ) are included in this comparison ( $n = 66,297$ ).**

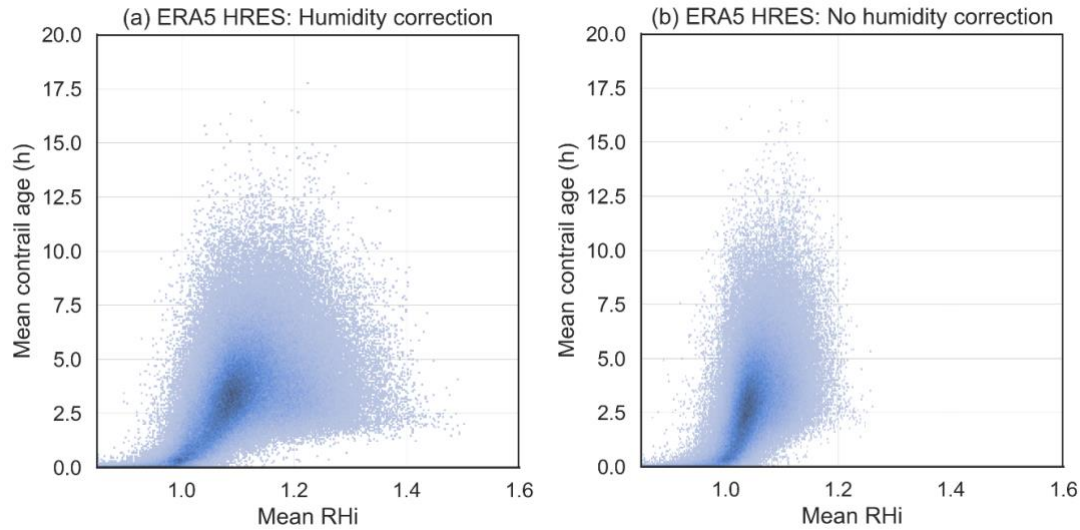

**Figure S25: The simulated mean contrail age versus the mean RH<sub>i</sub> throughout the contrail's lifetime for all contrail-forming flights over the North Atlantic in 2019: (a) with; and (b) without humidity correction being applied to the ERA5 HRES.**

**Table S7: The 2019 air traffic, emissions, meteorology and contrail statistics in the North Atlantic region for the different model runs used in the sensitivity analysis.**

| Annual statistics                                                                | Sensitivity analysis: 2019 |                               |                               |                      |                    |                   |
|----------------------------------------------------------------------------------|----------------------------|-------------------------------|-------------------------------|----------------------|--------------------|-------------------|
|                                                                                  | Nominal                    | No RH <sub>i</sub> correction | Constant nvPM EI <sub>n</sub> | Full nvPM activation | High aircraft mass | Low aircraft mass |
| Total number of flights                                                          | 477923                     | 477923                        | 477923                        | 477923               | 477923             | 477923            |
| Total flight distance (x10 <sup>9</sup> km)                                      | 1.184                      | 1.184                         | 1.184                         | 1.184                | 1.184              | 1.184             |
| Total fuel burn (x10 <sup>9</sup> kg)                                            | 8.922                      | 8.922                         | 8.922                         | 8.922                | 9.992              | 7.475             |
| Fuel burn per distance (kg km <sup>-1</sup> )                                    | 7.535                      | 7.535                         | 7.535                         | 7.535                | 8.439              | 6.313             |
| Mean aircraft mass (kg)                                                          | 207793                     | 207793                        | 207793                        | 207793               | 225931             | 177612            |
| Mean overall propulsion efficiency, $\eta$                                       | 0.3252                     | 0.3252                        | 0.3252                        | 0.3252               | 0.3234             | 0.3271            |
| Total CO <sub>2</sub> emissions (x10 <sup>9</sup> kg)                            | 28.18                      | 28.18                         | 28.18                         | 28.18                | 31.56              | 23.61             |
| Total NO <sub>x</sub> emissions (x10 <sup>9</sup> kg)                            | 0.1703                     | 0.1703                        | 0.1703                        | 0.1703               | 0.2130             | 0.1192            |
| Total nvPM number (x10 <sup>24</sup> )                                           | 8.379                      | 8.379                         | 8.922                         | 8.379                | 8.920              | 7.551             |
| Mean nvPM EI <sub>n</sub> (x10 <sup>15</sup> kg <sup>-1</sup> )                  | 0.9391                     | 0.9391                        | 1.000                         | 0.9391               | 0.8926             | 1.010             |
| Flights forming persistent contrails (%)                                         | 54.58                      | 51.68                         | 54.58                         | 54.58                | 54.68              | 54.63             |
| Dist. forming persistent contrails (%)                                           | 16.21                      | 14.67                         | 16.21                         | 16.21                | 16.46              | 16.20             |
| Mean contrail age (h)                                                            | 3.517                      | 3.205                         | 3.638                         | 3.539                | 3.550              | 3.439             |
| Contrail optical depth, $\tau$                                                   | 0.1215                     | 0.0799                        | 0.1306                        | 0.1240               | 0.1245             | 0.1168            |
| Contrail cirrus coverage (%)                                                     | 0.4730                     | 0.2395                        | 0.5274                        | 0.4775               | 0.4922             | 0.4445            |
| Cloud-contrail overlap (%)                                                       | 75.01                      | 74.75                         | 75.57                         | 75.15                | 75.21              | 74.68             |
| SW RF (mW m <sup>-2</sup> )                                                      | -236.2                     | -126.3                        | -273.7                        | -239.2               | -249.0             | -218.0            |
| LW RF (mW m <sup>-2</sup> )                                                      | 471.4                      | 247.2                         | 540.7                         | 476.3                | 496.1              | 436.3             |
| Net RF (mW m <sup>-2</sup> )                                                     | 235.2                      | 120.8                         | 267.1                         | 237.1                | 247.1              | 218.4             |
| Net ERF (mW m <sup>-2</sup> )                                                    | 98.77                      | 50.75                         | 112.2                         | 99.56                | 103.8              | 91.72             |
| EF <sub>contrail</sub> (x10 <sup>18</sup> J)                                     | 62.72                      | 32.47                         | 71.47                         | 63.22                | 65.98              | 58.12             |
| EF <sub>contrail</sub> per flight distance (x10 <sup>8</sup> J m <sup>-1</sup> ) | 0.5299                     | 0.2744                        | 0.6039                        | 0.5342               | 0.5575             | 0.4911            |
| EF <sub>contrail</sub> per contrail length (x10 <sup>8</sup> J m <sup>-1</sup> ) | 3.269                      | 1.870                         | 3.725                         | 3.295                | 3.387              | 3.031             |
| % flights responsible for 80% EF <sub>contrail</sub>                             | 11.97                      | 9.61                          | 11.91                         | 12.05                | 12.00              | 11.89             |

## 503    **References**

- 504    Abrahamson, J. P., Zelina, J., Andac, M. G., and Vander Wal, R. L.: Predictive Model Development for  
505    Aviation Black Carbon Mass Emissions from Alternative and Conventional Fuels at Ground and Cruise,  
506    Environ. Sci. Technol., 50, 12048–12055, <https://doi.org/10.1021/acs.est.6b03749>, 2016.
- 507    Agarwal, A., Speth, R. L., Fritz, T. M., Jacob, S. D., Rindlisbacher, T., Iovinelli, R., Owen, B., Miake-Lye, R.  
508    C., Sabnis, J. S., and Barrett, S. R. H.: SCOPE11 Method for Estimating Aircraft Black Carbon Mass and  
509    Particle Number Emissions, Environ. Sci. Technol., 53, 1364–1373, <https://doi.org/10.1021/acs.est.8b04060>,  
510    2019.
- 511    Agarwal, A., Meijer, V. R., Eastham, S. D., Speth, R. L., and Barrett, S. R. H.: Reanalysis-driven simulations  
512    may overestimate persistent contrail formation by 100-250%, Environ. Res. Lett., 17,  
513    <https://doi.org/10.1088/1748-9326/AC38D9>, 2022.
- 514    Boies, A. M., Stettler, M. E. J., Swanson, J. J., Johnson, T. J., Olfert, J. S., Johnson, M., Eggersdorfer, M. L.,  
515    Rindlisbacher, T., Wang, J., and Thomson, K.: Particle emission characteristics of a gas turbine with a double  
516    annular combustor, Aerosol Sci. Technol., 49, 842–855, <https://doi.org/10.1080/02786826.2015.1078452>, 2015.
- 517    Boulanger, D., Bundke, U., Gallagher, M., Gerbig, C., Hermann, M., Nédélec, P., Rohs, S., Sauvage, B.,  
518    Ziereis, H., Thouret, V., and Petzold, A.: IAGOS Time series [Data set],  
519    <https://doi.org/https://doi.org/10.25326/06>, 2022.
- 520    North Atlantic Skies - The gateway to Europe: [https://nats.aero/blog/2014/06/north-atlantic-skies-gateway-](https://nats.aero/blog/2014/06/north-atlantic-skies-gateway-europe/)  
521    europe/, last access: 15 October 2021.
- 522    Cumpsty, N. A. and Heyes, A.: Jet propulsion: A simple guide to the aerodynamics and thermodynamic design  
523    and performance of jet engines, Third Edition., Cambridge University Press, 2015.
- 524    Döpelheuer, A. and Lecht, M.: Influence of engine performance on emission characteristics, in: Symposium of  
525    the applied vehicle Technology Pane-Gas Turbine Engine Combustion, Emissions and alternative fuels, Lisbon,  
526    Portugal, 1998.
- 527    DuBois, D. and Paynter, G.: Fuel Flow Method2" for Estimating Aircraft Emissions, J. Aerosp., 115, 1–14,  
528    2006.
- 529    Durdina, L., Brem, B. T., Setyan, A., Siegerist, F., Rindlisbacher, T., and Wang, J.: Assessment of Particle  
530    Pollution from Jetliners: from Smoke Visibility to Nanoparticle Counting, Environ. Sci. Technol., 51, 3534–

531 3541, <https://doi.org/10.1021/acs.est.6b05801>, 2017.

532 EASA: Implementation of the latest CAEP amendments to ICAO Annex 16 Volumes I, II and III, 2020.

533 ICAO Aircraft Engine Emissions Databank (07/2021): [https://www.easa.europa.eu/domains/environment/icao-](https://www.easa.europa.eu/domains/environment/icao-aircraft-engine-emissions-databank)

534 [aircraft-engine-emissions-databank](https://www.easa.europa.eu/domains/environment/icao-aircraft-engine-emissions-databank), last access: 17 August 2021.

535 Eurocontrol: User Manual for the Base of Aircraft Data (BADA) Revision 3.12., Eurocontrol Experimental

536 Centre, 2014.

537 Eurocontrol: User Manual for the Base of Aircraft Data (BADA) Family 4, 2016.

538 Gierens, K., Matthes, S., and Rohs, S.: How Well Can Persistent Contrails Be Predicted?, *Aerosp.* , 7, 169,

539 <https://doi.org/10.3390/AEROSPACE7120169>, 2020.

540 Hersbach, H., Bell, B., Berrisford, P., Hirahara, S., Horányi, A., Muñoz-Sabater, J., Nicolas, J., Peubey, C.,

541 Radu, R., Schepers, D., Simmons, A., Soci, C., Abdalla, S., Abellan, X., Balsamo, G., Bechtold, P., Biavati, G.,

542 Bidlot, J., Bonavita, M., De Chiara, G., Dahlgren, P., Dee, D., Diamantakis, M., Dragani, R., Flemming, J.,

543 Forbes, R., Fuentes, M., Geer, A., Haimberger, L., Healy, S., Hogan, R. J., Hólm, E., Janisková, M., Keeley, S.,

544 Laloyaux, P., Lopez, P., Lupu, C., Radnoti, G., de Rosnay, P., Rozum, I., Vamborg, F., Villaume, S., and

545 Thépaut, J. N.: The ERA5 global reanalysis, *Q. J. R. Meteorol. Soc.*, <https://doi.org/10.1002/qj.3803>, 2020.

546 Koop, T., Luo, B., Tsias, A., and Peter, T.: Water activity as the determinant for homogeneous ice nucleation in

547 aqueous solutions, *Nature*, 406, 611–614, <https://doi.org/10.1038/35020537>, 2000.

548 Moore, R. H., Thornhill, K. L., Weinzierl, B., Sauer, D., D’Ascoli, E., Kim, J., Lichtenstern, M., Scheibe, M.,

549 Beaton, B., and Beyersdorf, A. J.: Biofuel blending reduces particle emissions from aircraft engines at cruise

550 conditions, *Nature*, 543, 411–415, <https://doi.org/10.1038/nature21420>, 2017.

551 Murphy, D. M. and Koop, T.: Review of the vapour pressures of ice and supercooled water for atmospheric

552 applications, *Q. J. R. Meteorol. Soc.*, 131, 1539–1565, <https://doi.org/10.1256/QJ.04.94>, 2005.

553 Parr, W. C. and Schucany, W. R.: Minimum distance and robust estimation, *J. Am. Stat. Assoc.*, 75, 616–624,

554 <https://doi.org/10.1080/01621459.1980.10477522>, 1980.

555 Petzold, A., Neis, P., Rütimann, M., Rohs, S., Berkes, F., G. J. Smit, H., Krämer, M., Spelten, N., Spichtinger,

556 P., Nédélec, P., and Wahner, A.: Ice-supersaturated air masses in the northern mid-latitudes from regular in situ

557 observations by passenger aircraft: Vertical distribution, seasonality and tropospheric fingerprint, *Atmos. Chem.*

558 *Phys.*, 20, 8157–8179, <https://doi.org/10.5194/ACP-20-8157-2020>, 2020.

559 Rädcl, G. and Shine, K. P.: Validating ECMWF forecasts for the occurrence of ice supersaturation using visual  
560 observations of persistent contrails and radiosonde measurements over England, *Q. J. R. Meteorol. Soc.*, 136,  
561 1723–1732, <https://doi.org/10.1002/qj.670>, 2010.

562 Reutter, P., Neis, P., Rohs, S., and Sauvage, B.: Ice supersaturated regions: Properties and validation of ERA-  
563 Interim reanalysis with IAGOS in situ water vapour measurements, *Atmos. Chem. Phys.*, 20, 787–804,  
564 <https://doi.org/10.5194/ACP-20-787-2020>, 2020.

565 Schumann, U.: A contrail cirrus prediction model, *Geosci. Model Dev.*, 5, 543–580,  
566 <https://doi.org/10.5194/gmd-5-543-2012>, 2012.

567 Schumann, U. and Graf, K.: Aviation-induced cirrus and radiation changes at diurnal timescales, *J. Geophys.*  
568 *Res. Atmos.*, 118, 2404–2421, <https://doi.org/10.1002/jgrd.50184>, 2013.

569 Schumann, U., Penner, J. E., Chen, Y., Zhou, C., and Graf, K.: Dehydration effects from contrails in a coupled  
570 contrail–climate model, *Atmos. Chem. Phys.*, 15, 11179–11199, <https://doi.org/10.5194/acp-15-11179-2015>,  
571 2015.

572 Schumann, U., Poll, I., Teoh, R., Koelle, R., Spinielli, E., Molloy, J., Koudis, G. S., Baumann, R., Bugliaro, L.,  
573 Stettler, M., and Voigt, C.: Air traffic and contrail changes over Europe during COVID-19: A model study,  
574 *Atmos. Chem. Phys.*, 21, 7429–7450, <https://doi.org/10.5194/ACP-21-7429-2021>, 2021.

575 Sonntag, D.: Advancements in the field of hygrometry, *Meteorol. Zeitschrift*, 3, 51–66,  
576 <https://doi.org/10.1127/metz/3/1994/51>, 1994.

577 Stettler, M. E. J.: Aviation emissions of black carbon and other air pollutants, PhD Thesis, University of  
578 Cambridge, 2013.

579 Stettler, M. E. J., Boies, A., Petzold, A., and Barrett, S. R. H.: Global civil aviation black carbon emissions,  
580 *Environ. Sci. Technol.*, 47, 10397–10404, <https://doi.org/10.1021/es401356v>, 2013.

581 Teoh, R., Stettler, M. E. J., Majumdar, A., Schumann, U., Graves, B., and Boies, A.: A methodology to relate  
582 black carbon particle number and mass emissions, *J. Aerosol Sci.*, 132, 44–59,  
583 <https://doi.org/10.1016/J.JAEROSCI.2019.03.006>, 2019.

584 Teoh, R., Schumann, U., and Stettler, M. E. J.: Beyond Contrail Avoidance: Efficacy of Flight Altitude Changes  
585 to Minimise Contrail Climate Forcing, 7, 121, <https://doi.org/10.3390/aerospace7090121>, 2020a.

586 Teoh, R., Schumann, U., Majumdar, A., and Stettler, M. E. J.: Mitigating the Climate Forcing of Aircraft



587 Contrails by Small-Scale Diversions and Technology Adoption, *Environ. Sci. Technol.*, 54, 2941–2950,  
588 <https://doi.org/10.1021/acs.est.9b05608>, 2020b.

589 Tompkins, A. M., Gierens, K., and Rädcl, G.: Ice supersaturation in the ECMWF integrated forecast system, *Q.*  
590 *J. R. Meteorol. Soc.*, 133, 53–63, <https://doi.org/10.1002/qj.14>, 2007.

591 Voigt, C., Kleine, J., Sauer, D., Moore, R. H., Bräuer, T., Le Clercq, P., Kaufmann, S., Scheibe, M., Jurkat-  
592 Witschas, T., Aigner, M., Bauder, U., Boose, Y., Borrmann, S., Crosbie, E., Diskin, G. S., DiGangi, J., Hahn,  
593 V., Heckl, C., Huber, F., Nowak, J. B., Rapp, M., Rauch, B., Robinson, C., Schripp, T., Shook, M., Winstead,  
594 E., Ziemba, L., Schlager, H., and Anderson, B. E.: Cleaner burning aviation fuels can reduce contrail cloudiness,  
595 *Commun. Earth Environ.* 2021 21, 2, 1–10, <https://doi.org/10.1038/s43247-021-00174-y>, 2021.

596 Vömel, H.: Saturation vapor pressure formulations, National Center for Atmospheric Research, Earth Observing  
597 Laboratory. Boulder, CO, USA, 2016.

598
